# Supplementary material for: NSUN2-mediated RNA 5-methylcytosine promotes esophageal squamous cell carcinoma progression via LIN28B-dependent GRB2 mRNA stabilization
Source: PubMed Central journal article supplement (PMC8484015; doi:10.1038/s41388-021-01978-0), 2021-08-03
Supplement: 41388_2021_1978_MOESM1_ESM.pdf [file 41388_2021_1978_MOESM1_ESM.pdf]

## Supplementary Information files

### NSUN2-mediated RNA 5-methylcytosine promotes esophageal squamous cell carcinoma progression via LIN28B-dependent GRB2 mRNA stabilization

Su *et al.*

#### Supplementary Materials and methods

#### Supplementary Figures

**Supplementary Fig. 1:** Expression levels of *NSUN2* and *NSUN6* in patients with ESCC. Related to Fig. 1.

**Supplementary Fig. 2:** Correlation between expressions of potential transcription factors and *NSUN2* at mRNA levels. Related to Fig. 2.

**Supplementary Fig. 3:** Effects of NSUN2 on ESCC cell migration and invasion. Related to Fig. 3.

**Supplementary Fig. 4:** Validation of *Nsun2* knockout mice. Related to Fig. 3.

**Supplementary Fig. 5:** Distribution profiles of RNA m<sup>5</sup>C modification in human ESCC. Related to Fig. 4.

**Supplementary Fig. 6:** Validation of the binding abilities of potential *GRB2*[m<sup>5</sup>C] binding proteins to methylated or unmethylated *GRB2* probes. Related to Fig. 6.

**Supplementary Fig. 7:** Effects of NSUN2-GRB2 axis on malignant cell phenotypes of ESCC cells. Related to Fig. 7.

#### Supplementary Tables

**Supplementary Table 1:** Baseline demographic and clinical characteristics of individuals with ESCC used for qRT-PCR and m<sup>5</sup>C-RIP-qPCR in this study.

**Supplementary Table 2:** Associations between *NSUN2*, *GRB2* RNA level or *GRB2* m<sup>5</sup>C level and clinical characteristics of individuals with ESCC used for qRT-PCR and m<sup>5</sup>C-RIP-qPCR in this study.

**Supplementary Table 3:** Univariate and multivariate Cox regression analysis for overall survival in ESCC patients.

**Supplementary Table 4:** Baseline demographic and clinical characteristics of individuals with ESCC used for IHC in this study.

**Supplementary Table 5:** Associations between *NSUN2*, *GRB2* protein level and clinical characteristics of individuals with ESCC used for IHC in this study.

**Supplementary Table 6:** Univariate and multivariate Cox regression analysis for overall survival in ESCC patients.

**Supplementary Table 7:** Characteristics of ESCC individuals for RNA-BisSeq and RNA-Seq in this study.

**Supplementary Table 8:** Primers used in this study.

**Supplementary Table 9:** Antibodies utilized in this study.

**Supplementary Table 10:** Targeted sequences of shRNAs or siRNAs and probe sequences of *GRB2* used in this study.

## **Description of Additional Supplementary Files**

File Name: **Supplementary Data 1**

Description: m<sup>5</sup>C sites with differential methylation level identified in RNA-BisSeq of 7 paired ESCC in this study.

File Name: **Supplementary Data 2**

Description: Proteins identified in RNA pulldown and mass spectrometry analysis with *GRB2*[m<sup>5</sup>C] or *GRB2*[C].

## 1 **Supplementary Materials and methods**

### 2 **Patient sample collection**

3 This study consisted of two sets of ESCC patients: one set of 7 paired samples for RNA-BisSeq  
4 and RNA-Seq analyses collected from 2015–2017 ([Supplementary Table 7](#)) and another set of  
5 215 paired samples for verification of the sequencing results collected from 2012–2014  
6 ([Supplementary Table 1](#)). All tissue specimens used in this study were obtained during  
7 esophageal cancer resection surgery at Sun Yat-sen University Cancer Center (SYSUCC) and  
8 were immediately stored in liquid nitrogen until RNA or protein extraction. ESCC diagnosis was  
9 histopathologically confirmed by at least 3 pathologists and clinical characteristics of each  
10 patient were obtained from medical records. Follow-up data were obtained by accessing  
11 medical records, telephone calls or outpatient visits. Patient's overall survival (OS) time was  
12 measured from the date of tumor diagnosis to the date of last follow-up or death. Tumor  
13 stages were defined according to the 7th edition of the AJCC Cancer Staging System [1]. Among  
14 the 215 paired ESCC samples, randomly selected 10 or 59 paired samples ([Supplementary  
15 Table 4](#)) were respectively used for western blotting or immunohistochemical staining (IHC).  
16 Written informed consent was obtained from each patient, and this study was approved by the  
17 Institutional Review Board of the Sun Yat-sen University Cancer Center.

### 18 **Cell lines and cell culture**

19 Human ESCC cell lines KYSE30 and EC109 were kind gifts from Dr. Xinyuan Guan at SYSUCC.  
20 Human embryonic kidney cell line 293T (HEK293T) was purchased from the Cell Bank of Type  
21 Culture Collection of the Chinese Academy of Sciences Shanghai Institute of Biochemistry and  
22 Cell Biology. Cells were cultured in DMEM (HEK293T) or RPMI 1640 (all other cell lines)

23 medium supplemented with 10% fetal bovine serum (FBS, Invitrogen, Carlsbad, CA, USA) in an  
24 atmosphere of 5% CO<sub>2</sub> and 99% relative humidity at 37°C. All cell lines were authenticated by  
25 STR profiling and tested for free from mycoplasma infection.

### 26 **Cell proliferation, migration and invasion assays**

27 For cell proliferation assays, KYSE30 and EC109 cells were seeded in 96-well plates (3,000 cells  
28 per well). Cell viability was measured at indicated time points using Cell Counting Kit-8 (CCK-8,  
29 Dojindo Laboratories, Kumamoto, Japan). Each experiment was repeated three times, with six  
30 replicates each time. For migration assays, 8- $\mu$ m pore inserts were placed in a 24-well culture  
31 plate.  $1 \times 10^5$  cells in 200  $\mu$ l of serum-free medium were added into the upper filters. 500  $\mu$ l  
32 medium containing 20% FBS was added to the lower chamber. After incubation for 15 h in 5%  
33 CO<sub>2</sub> at 37°C, cells migrated through the filters were fixed with methanol, stained with 0.5%  
34 crystal violet and photographed. Cells in three random fields were counted. Invasion assays  
35 were conducted following a similar protocol with coating filters with 30  $\mu$ g of matrigel (BD  
36 Biosciences, San Diego, CA, USA). Each experiment was performed three times.

### 37 **RNA extraction and quantitative real-time PCR (qRT-PCR)**

38 Total RNA was isolated from cell lines or tissues using TRIzol reagent (Invitrogen, Carlsbad, CA,  
39 USA). Reverse transcription reactions with 2  $\mu$ g total RNA were performed using the RevertAid  
40 First-Strand cDNA Synthesis Kit (Thermo Fisher Scientific, Waltham, MA, USA). Synthesized  
41 cDNA was used for qRT-PCR analysis on a Roche Light Cycler 480 II using the SYBR-green  
42 method [2].  *$\beta$ -ACTIN* was employed as an internal control. Relative RNA levels of indicated  
43 genes were calculated using the  $2^{-\Delta\Delta CT}$  method and normalized to  *$\beta$ -ACTIN*. Three replicates

44 were performed in each experiment. The primer sequences are shown in [Supplementary Table](#)  
45 [8](#).

#### 46 **Cell lysis and protein immunoprecipitation**

47 Cells were lysed with 1 × RIPA buffer supplemented with a Protease/Phosphatase Inhibitor  
48 Cocktail (Pierce, USA). Lysates were centrifuged. Supernatants were treated with RNase  
49 inhibitor (New England Biolab, Ipswich, MA, USA) and collected for immunoblotting or  
50 immunoprecipitation with the indicated antibodies.

#### 51 **Western blotting analysis**

52 Protein extracts were prepared using 1 × RIPA buffer supplemented with a  
53 Protease/Phosphatase Inhibitor Cocktail (Pierce, USA). Total protein (20 µg) was subjected to  
54 SDS-PAGE and transferred to PVDF membranes (Millipore, Billerica, MA, USA). Membranes  
55 were incubated overnight at 4°C with specific primary antibody ([Supplementary Table 9](#)) and  
56 visualized with a Phototope Horseradish Peroxidase Western Blot Detection kit (Thermo Fisher  
57 Scientific, Waltham, MA, USA).

#### 58 **Chromatin immunoprecipitation (ChIP) assays**

59 ChIP assays were performed using the EZ-Magna ChIPTM A/G Kit (17-10086, Millipore). Briefly,  
60 cells were treated with 1% formaldehyde for cross linking, lysed and sonicated on ice. Lysates  
61 were then immunoprecipitated with antibody against E2F1 (66515-1-Ig, Proteintech) or IgG.  
62 Pre-immunoprecipitated lysates of each sample were saved as input. The bound DNA was  
63 eluted, purified and subject to qPCR with specific primers ([Supplementary Table 8](#)). qPCR  
64 products were used for agarose gel electrophoresis.

#### 65 **Chemicals**

66 Chemical carcinogen 4-NQO (N8141) and 2% propylene glycol (V900115) were purchased from  
67 Sigma-Aldrich (St. Louis, MO, USA).

#### 68 **4-NQO-induced ESCC model in *Nsun2* knockout transgenic mice**

69 Chemical carcinogen 4-NQO was used to establish mouse model of ESCC in *Nsun2* knockout  
70 (*Nsun2*<sup>+/-</sup>) or *Nsun2* wild-type (*Nsun2*<sup>+/+</sup>) C57BL/6J mice donated from Nanjing Medical  
71 University. To generate the *Nsun2*<sup>+/-</sup> mice, Cas9 mRNAs and two small guide RNAs targeting  
72 the fourth exon of *Nsun2* were injected into fertilized eggs, resulting in a 14-bp frameshift  
73 mutation on one allele of *Nsun2*. DNA extracted from mouse tails was used for Sanger  
74 sequencing to validate the *Nsun2* genotypes. Six-week-old *Nsun2*<sup>+/+</sup> and *Nsun2*<sup>+/-</sup> mice were  
75 given 100 µg/ml 4-NQO in the drinking water for 16 weeks followed by normal water feeding  
76 [3]. 4-NQO was prepared in propylene glycol as a 5 mg/ml stock solution once a week and used  
77 at a 1:50 dilution in drinking water. The mice were grouped randomly. Some *Nsun2*<sup>+/+</sup> mice  
78 were sacrificed 4 weeks ( $n = 3$ ) and 8 weeks ( $n = 3$ ) after 4-NQO withdrawal, and some ( $n = 10$ )  
79 were sacrificed along with age-matched *Nsun2*<sup>+/-</sup> mice ( $n = 10$ ) 12 weeks after 4-NQO  
80 withdrawal. The other mice ( $n = 10$  per group) were monitored to determine the survival rate.  
81 Immediately after the death of the mice, the esophagus was stripped, cut open longitudinally,  
82 spread flat and photographed. Tumors with diameters  $\geq 0.5$  mm were counted and tumor  
83 volume (length x width<sup>2</sup> x 0.5) was calculated. Esophagus was embedded in paraffin after 10%  
84 formalin buffer treatment or was used for protein extraction. Hematoxylin and eosin (H&E)  
85 staining was performed for histological examination. IHC or western blotting assay was  
86 conducted to assess levels of indicated protein. Pathological diagnosis was assessed by three  
87 pathologists blinded to the group allocation. To monitor survival, the differences in survival

88 time between *Nsun2*<sup>+/+</sup> and *Nsun2*<sup>+/-</sup> mice were determined using Kaplan-Meier method. The  
89 animals that were euthanized for signs of illness or those that were found dead were included  
90 as events in the survival curve. Animal experiments were carried out with protocols and  
91 guidelines approved by the Institutional Animal Care and Use Committee of Sun Yat-sen  
92 University Cancer Center.

### 93 **Sanger sequencing of PCR products**

94 To validate the knockdown efficiency of *Nsun2* transgenic mice, DNA (1 µg) was extracted from  
95 mouse tails using the DNA Mini Kit (Qiagen, Hilden, Germany) and was amplified by PCR with  
96 the primers shown in [Supplementary Table 8](#). PCR products were separated on an agarose gel  
97 and purified, followed by Sanger sequencing (Ruibiotech, Beijing, China).

### 98 **Immunohistochemical staining (IHC) analysis**

99 Paraffin-embedded tissue sections were selected for IHC analysis. Primary antibodies against  
100 NSUN2 (Proteintech, 20854-1-AP) and GRB2 (Abcam, ab32037) were used. Briefly, the sections  
101 were deparaffinized in xylene for 10 min twice and were rehydrated by sequentially incubation  
102 with 95%, 85% and 75% ethanol 5 min for each twice, followed by the heat-mediated antigen  
103 retrieval using microwave. After incubation in 3% H<sub>2</sub>O<sub>2</sub> for 10 minutes, the slides were blocked  
104 with 5% goat blocking serum at room temperature for 30 min and incubated with the  
105 respective primary antibodies at 4°C overnight. Then, after washing, the slides were incubated  
106 with the biotinylated secondary antibody for 30 minutes at room temperature. Finally, the  
107 slides were incubated in ABC reagent for 30 min (the ABC Kit, Pierce, USA) and stained with  
108 DAB and counterstained with hematoxylin. The staining intensity score was defined as negative  
109 (0), weak (1), moderate (2) and strong (3) while the positive area score was estimated as 0 (≤

110 10%), 1 (11% to 25%), 2 (26% to 50%), 3 (51% to 75%) and 4 (> 75%). Both the staining intensity  
111 and positive area scores were independently assessed by three pathologists without prior  
112 knowledge of the patient data. IHC score (values from 0 to 12) was calculated by multiplying  
113 the staining intensity score and the positive area score. For esophageal tissues collected from  
114 the 4-NQO-treated mice, H&E was also performed.

### 115 **Construction of RNA-BisSeq and RNA-Seq Libraries**

116 Total RNA from ESCC specimens was used for mRNAs enrichment using a Dynabeads mRNA  
117 purification kit (Ambion, Austin, Texas, USA). For the RNA-BisSeq experiment, the enriched  
118 mRNAs along with in-vitro-transcribed mouse *Dhfr* mRNA as methylation conversion control  
119 were fragmented and converted using bisulphite as previously described [4]. Briefly, 1 µg of  
120 the enriched mRNAs and 5 ng *Dhfr* mRNA were subject to fragmentation using the RNA  
121 fragmentation reagents (Ambion, Austin, Texas, USA). After ethanol precipitation, the  
122 fragmented RNAs were resuspended in 100 µl pre-prepared bisulfite solution (pH 5.1) and  
123 incubated at 75 °C for 4.5 h. The pre-prepared bisulfite solution is a mixture of hydroquinone  
124 (600 µM; Sigma-Aldrich, St. Louis, MO, USA) and sodium bisulfite (40%; Sigma-Aldrich, St. Louis,  
125 MO, USA) at a ratio of 1:100. Then the reaction product was desalted using the Micro Bio-spin  
126 6 chromatography columns (Bio-Rad, Hercules, CA, USA) and desulfonated in Tris-HCl (1 M, pH  
127 9.0) at 75°C for 60 min. The RNAs were precipitated with ethanol and reverse transcribed with  
128 ACT random hexamers and used for library construction. Each RNA-BisSeq sample was also  
129 subjected to an RNA sequencing assay. Sequencing was carried out on the Illumina HiSeq X-Ten  
130 sequencing system.

### 131 **RNA-BisSeq bioinformatics analysis**



132 We utilized fastp [5] to remove the adaptors and low-quality bases from the raw reads. The  
133 clean reads were mapped to the hg38 genome using meRanGh from meRanTK (v1.2.1b) [6].  
134 Analysis of the *Dhfr* spike-in showed C to T conversion rates > 99%. The m<sup>5</sup>C sites were called  
135 using meRanCall from meRanTK. Only the sites with a coverage depth  $\geq 30$ , methylation level  $\geq$   
136 0.1 and methylated cytosine depth  $\geq 5$  in at least 2 samples were considered reliable. The m<sup>5</sup>C  
137 annotation was performed with intersectBed from BEDTools (v2.28.0) [7] with the annotation  
138 file (GENCODE v25) download from the GENCODE database [8].

### 139 **Differential m<sup>5</sup>C methylation analysis**

140 To compare the methylation levels between ESCC tumor and adjacent normal samples, we used  
141 m<sup>5</sup>C sites meeting the following criteria according to the previous study [9]: read coverage  $\geq 10$   
142 in at least 8 samples, including  $\geq 4$  normal and  $\geq 4$  tumor samples. M<sup>5</sup>C sites with  $P \leq 0.05$   
143 (two-sided unpaired Wilcoxon and Mann-Whitney tests) and a mean m<sup>5</sup>C level difference  $\geq$   
144 0.05 ( $|\text{mean m}^5\text{C level}_{\text{tumor}} - \text{mean m}^5\text{C level}_{\text{normal}}|$ ) were considered to contain statistically  
145 significantly different m<sup>5</sup>C methylation. The hypermethylated m<sup>5</sup>C sites in tumor samples were  
146 those with  $P \leq 0.05$  and  $\text{mean m}^5\text{C level}_{\text{tumor}} - \text{mean m}^5\text{C level}_{\text{normal}} \geq 0.05$ , while the  
147 hypomethylated m<sup>5</sup>C sites in tumor samples were those with  $P \leq 0.05$  and  $\text{mean m}^5\text{C level}_{\text{tumor}}$   
148  $- \text{mean m}^5\text{C level}_{\text{normal}} < -0.05$ .

### 149 **RNA-Seq bioinformatics analysis**

150 The raw reads of the RNA-Seq data were filtered with the same method as the RNA-BisSeq  
151 data and then mapped to the hg38 genome with hisat2(v2.1.0) [10]. HTSeq (v0.12.4) [11] was  
152 used to count the number of reads mapped to each gene (GENCODE v25). Differentially

153 expressed genes were calculated by the DESeq2 package [12] with  $|\text{fold-change}| \geq 1.5$  and  
154 false-discovery-rate (FDR)  $\leq 0.05$ .

#### 155 **Pathway analysis via Ingenuity Pathway Analysis (IPA)**

156 Genes with m<sup>5</sup>C-hypermethylated transcripts were uploaded into IPA software for core  
157 analysis to identify canonical pathways (FDR  $\leq 0.1$ ) [13].

#### 158 **M<sup>5</sup>C RNA immunoprecipitation followed by qRT-PCR (m<sup>5</sup>C-RIP-qPCR)**

159 The m<sup>5</sup>C-RIP-qPCR procedure was performed according to a previous study with some  
160 modifications [14]. Briefly, total RNA from tissues or cells was purified into mRNAs using a  
161 Dynabeads mRNA purification kit (Ambion, Austin, Texas, USA). Then, the mRNAs (2  $\mu\text{g}$ ) were  
162 fragmented and incubated at 4°C overnight with the pre-mixture of anti-m<sup>5</sup>C antibody and  
163 magnetic Dynabeads protein A/G (Millipore, Billerica, MA, USA) in RIP immunoprecipitation  
164 buffer (Millipore, Billerica, MA, USA). One-tenth of fragmented mRNAs were used as an input.  
165 After treating with proteinase K (10 mg/ml, New England Biolabs, Ipswich, MA, USA), the  
166 bound RNAs were extracted with phenol/chloroform/isoamyl alcohol and subjected to  
167 qRT-PCR using gene-specific primers shown in **Supplementary Table 8**. Relative m<sup>5</sup>C levels of  
168 the indicated transcripts were evaluated with input normalization.

#### 169 **Photoactivatable-Ribonucleoside-Enhanced Crosslinking and Immunoprecipitation** 170 **(PAR-CLIP)**

171 PAR-CLIP was performed as previously described [15,16] with some modifications. Briefly, cells  
172 were cultured in medium supplemented with 4-thiouridine (Sigma-Aldrich, St. Louis, MO, USA)  
173 for 14 h, followed by crosslinking twice with UV light. Cells were lysed and sonicated. Then, the  
174 protein-RNA mixture was incubated and rotated overnight at 4°C with the premixture of

175 Dynabeads protein A/G (Millipore, Billerica, MA, USA) and anti-LIN28B antibody. The bound  
176 RNA was then treated with proteinase K (New England Biolabs, Ipswich, MA, USA) and  
177 extracted by phenol/chloroform/isoamyl alcohol, followed by 3' linker ligation. The NEBNext  
178 small RNA library prep kit (E7330S, New England Biolabs, Ipswich, MA, USA) was used for  
179 library construction of PAR-CLIP-Seq. Sequencing was performed on an Illumina HiSeq4000. For  
180 PAR-CLIP-qPCR, purified RNAs were reverse transcribed and subjected to qRT-PCR using  
181 primers shown in [Supplementary Table 8](#). An equal amount of cell extract mixed with IgG was  
182 saved as an isotype control and one-tenth of cell extract was saved as an input control. The  
183 relative enrichment of the interest transcripts was calculated with input normalization.  
184 PAR-CLIP-biotin chemiluminescent nucleic acid detection were performed according to the  
185 previous study [17]. Briefly, the LIN28B bound RNAs were biotinylated using the Pierce<sup>TM</sup> RNA  
186 3' End Desthiobiotinylation Kit (Thermo Fisher Scientific, Waltham, MA, USA). One tenth of the  
187 samples were subjected to western blotting assays to detect protein immunoprecipitation  
188 efficiency. Other samples were separated in native polyacrylamide gels and then transferred to  
189 a nylon transfer membrane, followed by visualized with the chemiluminescent nucleic acid  
190 detection Module Kit (Thermo Fisher Scientific, Waltham, MA, USA) or incubated with anti-m<sup>5</sup>C  
191 antibody (Abcam, ab10805) to detect the m<sup>5</sup>C level.

## 192 **PAR-CLIP-Seq data analysis**

193 Bowtie (v1.2.2) [18] was used to map sequencing reads against the hg38 genome with the  
194 parameters “-v 3 -m 5 --best -strata”. PARalyzer (v1.5) [19] was used to define LIN28B binding  
195 groups with default parameters. The PAR-CLIP-Seq signal tracks were visualized using  
196 Integrative Genomics Viewer (IGV) [20].

197 **RNA interference**

198 Small interfering RNA (siRNA) targeting *TFAP2C*, *SP1*, *NRF1*, *E2F1* or *YBX1* genes were  
199 synthesized by Umine Biotechnology or GenePharma ([Supplementary Table 10](#)). Transfections  
200 with siRNA (50 nM) were performed with lipofectamine 2000 (Life Technologies, Carlsbad,  
201 USA). Briefly, ESCC cells were seeded in 6-well plates with complete culture medium without  
202 antibiotics one day before transfection. When cells were at appropriate confluent, they were  
203 maintained in serum-free culture medium and transfected with siRNA-lipofectamine 2000  
204 mixture. The medium was substituted with complete culture medium at 6 h after transfection.  
205 The transfected cells were cultured for 48 h and then were harvested for transfection  
206 efficiency validation or other analysis.

207 **Plasmids, lentivirus production and transduction**

208 To achieve depletion of *NSUN2*, *LIN28B* or *GRB2* in cells, short hairpin RNA (shRNA) specifically  
209 targeting *NSUN2*, *LIN28B* or *GRB2* ([Supplementary Table 10](#)) was respectively synthesized and  
210 inserted into pLKD-CMV-Puro-U6 (Obio Technology, Shanghai, China), pLKD-U6-MCS-CMV-Puro  
211 (Umine Biotechnology Co.,LTD, Guangzhou, China) or pLKD-U6-MCS-CMV-Blasticidin (Umine  
212 Biotechnology Co.,LTD, Guangzhou, China) lentiviral shRNA vector. Plasmids containing  
213 shNSUN2-insensitive wild-type (WT) and catalytic mutant *NSUN2* were constructed as  
214 described in previous studies [4,9]. One mutant (MUT1) carried a point mutation at catalytic  
215 site (C321A) while another mutant (MUT2) carried point mutations at both catalytic site  
216 (C321A) and releasing site (C271A). Full-length cDNA of shNSUN2-insensitive wild-type and  
217 catalytic mutant *NSUN2* was synthesized and subcloned into pLenti-CMV-MCS-PGK-Puro-WPRE  
218 lentiviral expression vector (Obio Technology, Shanghai, China) to construct lentiviral vector

219 expressing wild-type or catalytic mutant *NSUN2*. For the *GRB2* overexpression vector,  
220 synthesized *GRB2* sequence was inserted into pLVX-EF1a-Puro-WPRE-CMV-MCS vector (Umine  
221 Biotechnology Co.,LTD, Guangzhou, China). HEK293T cells were seeded with complete culture  
222 medium without antibiotics one day before transfection. When the cells were at proper  
223 confluent, they were transfected with the vector described above and the lentiviral vector  
224 packaging system (Obio Technology, Shanghai, China) using lipofectamine 2000 to produce  
225 lentiviruses. The lentiviral supernatant was harvested at 48 and 72 h post-transduction and  
226 filtered through 0.45- $\mu$ m PVDF filters. Then the lentiviruses were concentrated by  
227 centrifugation and dissolved in the DMEM medium. ESCC cells were infected with the resultant  
228 lentiviruses in the presence of polybrene (Sigma-Aldrich, St. Louis, MO, USA) and were  
229 maintained in complete culture medium 24 h after infection, followed by selection with  
230 puromycin (2  $\mu$ g/ml) or blasticidin (5  $\mu$ g/ml) for two weeks. Transfection efficiency was  
231 confirmed by western blotting. The corresponding scrambled shRNA vectors or empty lentiviral  
232 vectors were used as negative controls.

### 233 **Construction of vectors**

234 To construct expression vector for FLAG-tagged LIN28B, synthesized cDNA encoding full-length  
235 (LIN28B-WT) or CSD domain (residues 21–112) truncated (LIN28B- $\Delta$ CSD) or W36A mutant of  
236 LIN28B were subcloned into pcDNA3.1-3 $\times$  FLAG vector (Umine Biotechnology Co.,LTD,  
237 Guangzhou, China).

### 238 **RNA stability assay**

239 Cells were seeded in 6-well plates and treated with 5  $\mu$ g/ml actinomycin D for 8 h, 6 h, 4 h, 2 h  
240 and 0 h before cell collection. Total RNA (2  $\mu$ g) was extracted with TRIzol reagent (Invitrogen,

241 Carlsbad, CA, USA) and analyzed by qRT-PCR. The mRNA half-life time was calculated as  
242 previously described [21].

### 243 **Luciferase reporter gene assays**

244 For promoter reporter assays, the *NSUN2* promoter sequence (-1000 bp from the transcription  
245 start site) with wild-type binding site (TGC<sup>5</sup>GC<sup>5</sup>GAAG) of E2F1 and the corresponding oligos  
246 with mutant binding site (GGGATTCTTTG) of E2F1 were designed, synthesized and cloned into  
247 pGL4-promoter vector by Umine Biotechnology (Guangzhou, China). ESCC cells were seeded in  
248 24-well plates and were co-transfected with 500 ng pGL4-promoter vectors, 100 ng pRL-SV40  
249 Renilla vector (Promega, Madison, WI, USA) and 50 nM siRNA targeting *E2F1* mRNA or  
250 scramble. The transfected cells were cultured for 48 h and harvested for luciferase activity  
251 detection by Dual-Luciferase Reporter Assay System (Promega, Madison, WI, USA). The relative  
252 Fluc/Rluc activity was calculated by normalizing the activity of firefly luciferase to that of renilla  
253 luciferase. For *GRB2*-3'UTR reporter assays, *GRB2* 3'UTR with wild-type (GRB2-WT) or cytosine  
254 to guanine mutant m<sup>5</sup>C site (chr17:75318971; GRB2-MUT) was cloned into the downstream  
255 region of pmirGLO vector (Obio Technology, Shanghai, China). 300 ng pmirGLO vectors were  
256 co-transfected with 100 ng pRL-SV40 Renilla vector into ESCC cells with or without *NSUN2* or  
257 *LIN28B* knockdown in 24-well plates using lipofectamine 2000. The luciferase activity or RNA  
258 level was examined 48 h after transfection using the Dual-Luciferase Reporter Assay System or  
259 qRT-PCR assays, respectively, and was normalized using Renilla luciferase activity or mRNA  
260 level. Primers specific for Firefly luciferase and Renilla luciferase are listed in [Supplementary](#)  
261 [Table 8](#).

### 262 **RNA pulldown and mass spectrometry analysis**

263 Biotin-labeled RNA fragment (50 pmol) containing 50-bp *GRB2* RNA sequences with  
264 (*GRB2*[m<sup>5</sup>C]) or without (*GRB2*[C]) m<sup>5</sup>C modification at m<sup>5</sup>C site (chr17:75318971) were  
265 synthesized from Ruibiotech (Beijing, China; [Supplementary Table 10](#)) and incubated with  
266 protein extracts from KYSE30 cells. Streptavidin beads were then added and the bead-bound  
267 proteins were extracted and subjected to mass spectrometry or western blotting analysis. To  
268 identify proteins preferentially binding to *GRB2*[m<sup>5</sup>C] RNA, we used the following criteria:  
269 unique peptides > 10, ratio of average LFQ intensity of *GRB2*[m<sup>5</sup>C] and *GRB2*[C] > 2.

### 270 **Protein expression and purification**

271 HEK293T cells were transfected with Flag-tagged wild-type or mutant (CSD truncated or W36A)  
272 *LIN28B* plasmids using lipofectamine 2000. The transfected cells were cultured for 48 h, and  
273 were harvested and lysed with lysis buffer followed by sonication at 4 °C. The lysate was then  
274 centrifuged at 12 000 rpm for 10 min and the clear lysate was incubated with Anti-Flag Affinity  
275 Gel (KAP0064, Dia-An Biotech, Wuhan, China) at 4 °C overnight. Then the bound complex was  
276 incubated with 3× Flag peptide elution buffer to elute the bound proteins. The purified proteins  
277 were verified with SDS-PAGE followed by western blotting.

### 278 **Computational model structure analysis**

279 The RNA structure was modelled from YBX1-m<sup>5</sup>C RNA complex (PDBID: 6A6L) [9] through Web  
280 3DNA (w3DNA) 2.0 [22]. Then the *LIN28B*-m<sup>5</sup>C RNA complex structure was modelled through  
281 molecular docking by HDOCK [23]. The structure was visualized by PyMol (Version 1.8.6.0). The  
282 residue interaction network was analyzed by RING software [24].

### 283 **RNA electrophoretic mobility shift assays (REMSA)**

284 Assays were performed using the LightShift Chemiluminescent RNA EMSA Kit (Thermo Fisher  
285 Scientific, Waltham, MA, USA). Biotin-labeled RNA probes were synthesized by Ruibiotech  
286 (Beijing, China; [Supplementary Table 10](#)). Briefly, 1  $\mu$ l biotin-labeled RNA probes (4 nM final  
287 concentration) were incubated with different concentrations (0–8  $\mu$ M) of purified full-length or  
288 mutant LIN28B proteins in binding buffer (10 mM HEPES pH 7.3, 20 mM KCl, 1 mM MgCl<sub>2</sub>, 1  
289 mM DTT, 5% glycerol, and 40 U/ml RNasin) at room temperature for 30 min. The RNA-protein  
290 mixtures were separated in 8% native polyacrylamide gels at 4 °C for 1 hour. Complexes was  
291 then transferred to a nylon transfer membrane, cross-linked to the membrane using the UVP  
292 cross-linker and detected by chemiluminescence.

### 293 **DNA methylation data analysis**

294 The Illumina HM450K methylation data and the matched RNA-seq data of esophageal  
295 squamous cell carcinoma ( $n = 82$ ) were downloaded from the TCGA database. We used the  
296 HOMER analysis tool [25] to analyse the methylation of *NSUN2* TSS region (default -1000bp to  
297 +100bp from the transcription start site of *NSUN2*). According to HOMER, a total of 13 probes  
298 annotated to *NSUN2* TSS region were included in the methylation analysis. The methylation  
299 level of each probe was measured as  $\beta$  value. We used the average  $\beta$  value of the 13 probes to  
300 represent the methylation level of *NSUN2* TSS region. Then Spearman's correlation analysis  
301 was used to examine the correlation between DNA methylation  $\beta$  value of *NSUN2* TSS region  
302 and *NSUN2* gene expression (FPKM) value.

### 303 **Public data processing**

304 To investigate the differential expression of indicated genes, a public microarray dataset of 179  
305 paired ESCC (GSE53625) [26] was downloaded from the Gene Expression Omnibus. The



306 differential expression levels of indicated genes were compared by two-sided paired *t* test.  
307 Prediction of TFs binding sites in *NSUN2* gene promoter region (-1,000 bp to transcription start  
308 site) were performed using JASPAR (PMID: 31701148), AnimalTFDB (PMID: 30204897),  
309 ChIPBase (PMID: 27924033), GTRD (PMID: 30445619) and hTFtarget (PMID: 32858223) and  
310 TFs-*NSUN2* co-expression analysis was integrated. Only TFs occurred in all these five databases  
311 and with positive correlation coefficient  $r > 0.30$  were considered, thus resulting in 4 potential  
312 TFs including TFAP2C, SP1, NRF1 and E2F1. Co-expressions of TFs and *NSUN2* were evaluated  
313 with Spearman's correlation analysis based on the GSE53625 dataset. Correlations between  
314 RNA levels and DNA methylation status of *NSUN2* were analyzed with Spearman's correlation  
315 analysis using data of ESCC from The Cancer Genome Atlas Program (TCGA). Copy number  
316 alterations (CNV) or mutations of *NSUN2* DNA were analyzed using data of ESCC from  
317 International Cancer Genome Consortium (ICGC), University of California at Los Angeles (UCLA)  
318 and the TCGA program.

### 319 **Statistical analysis**

320 Data in our work are presented as the mean  $\pm$  standard error of the mean (SEM) of at least  
321 three biological replicates. A nonparametric test was used to assess data with an abnormal  
322 distribution, while two-sided Student's *t*-test was performed to compare difference between  
323 two means when the data showed a normal distribution. The relationships between  
324 clinicopathological characteristics and indicates gene expression or patient death were  
325 determined by using two-sided Chi-square test or Fisher's exact tests. Spearman's correlations  
326 were used to determine the relationships between two continuous variables, and  $P < 0.05$  and  
327  $|r| > 0.30$  was considered significant. We used the two-sided log-rank test in univariate

328 survival analyses and the Cox proportional hazards model in multivariate survival analyses. The  
329 Kaplan-Meier plot was used for presentation. The hazard ratio (HR) and 95% confidence  
330 interval (CI) were calculated with age, sex, family history, smoking status, drinking status,  
331 treatment, tumor differentiation and tumor stage as covariates. We chose median value as  
332 cutoff value to distinguish patients with high ( $\geq$  median) or low ( $<$  median) levels of RNA or m<sup>5</sup>C  
333 of indicated genes. An IHC score of 6 was chosen as cut-off value for distinguishing patients'  
334 high ( $> 6$ ) or low ( $\leq 6$ ) expression of indicated protein. All the statistical analyses were  
335 performed using SPSS version 20.0 software (SPSS Inc., Chicago, IL, USA) or GraphPad Prism 8.0  
336 software (GraphPad Software, La Jolla, CA, USA).  $P < 0.05$  was considered statistically  
337 significant.

#### 338 **URLs**

339 ChIPBase v2.0, <http://rna.sysu.edu.cn/chipbase/>; Gene Transcription Regulation Database  
340 (GTRD), <http://gtrd.biouml.org/>; Database of Human Transcription Factors Targets (hTFtarget),  
341 <http://bioinfo.life.hust.edu.cn/hTFtarget>; Animal Transcription Factor Database (AnimalTFDB),  
342 <http://bioinfo.life.hust.edu.cn/AnimalTFDB/>; JASPAR, <http://jaspar.genereg.net/>; GENCODE  
343 database, <https://www.gencodegenes.org/>; The Gene Expression Omnibus,  
344 <https://www.ncbi.nlm.nih.gov/geo/>; Integrative Genomics Viewer (IGV), <http://www.igv.org/>.

#### 345 **Data availability**

346 The accession number for the RNA-BisSeq, RNA-Seq and LIN28B PAR-CLIP-Seq data reported in  
347 this paper is HRA000293 (<https://bigd.big.ac.cn/gsa-human/browse/HRA000293>).

348

#### 349 **References**

- 350 1. Sobin LH, Compton CC. TNM seventh edition: what's new, what's changed:  
351 communication from the International Union Against Cancer and the American Joint  
352 Committee on Cancer. *Cancer* 2010; **116**: 5336–5339.
- 353 2. Schneeberger C, Speiser P, Kury F, Zeillinger R. Quantitative detection of reverse  
354 transcriptase-PCR products by means of a novel and sensitive DNA stain. *PCR Methods*  
355 *Appl* 1995; **4**: 234–238.
- 356 3. Tang XH, Knudsen B, Bemis D, Tickoo S, Gudas LJ. Oral cavity and esophageal  
357 carcinogenesis modeled in carcinogen-treated mice. *Clin Cancer Res* 2004; **10**: 301–313.
- 358 4. Yang X, Yang Y, Sun BF, Chen YS, Xu JW, Lai WY *et al.* 5-methylcytosine promotes mRNA  
359 export - NSUN2 as the methyltransferase and ALYREF as an m(5)C reader. *Cell Res* 2017;  
360 **27**: 606–625.
- 361 5. Chen S, Zhou Y, Chen Y, Gu J. fastp: an ultra-fast all-in-one FASTQ preprocessor.  
362 *Bioinformatics* 2018; **34**: i884–i890.
- 363 6. Rieder D, Amort T, Kugler E, Lusser A, Trajanoski Z. meRanTK: methylated RNA analysis  
364 ToolKit. *Bioinformatics* 2016; **32**: 782–785.
- 365 7. Quinlan AR, Hall IM. BEDTools: a flexible suite of utilities for comparing genomic  
366 features. *Bioinformatics* 2010; **26**: 841–842.
- 367 8. Harrow J, Frankish A, Gonzalez JM, Tapanari E, Diekhans M, Kokocinski F *et al.* GENCODE:  
368 the reference human genome annotation for The ENCODE Project. *Genome Res* 2012;  
369 **22**: 1760–1774.
- 370 9. Chen X, Li A, Sun BF, Yang Y, Han YN, Yuan X *et al.* 5-methylcytosine promotes  
371 pathogenesis of bladder cancer through stabilizing mRNAs. *Nat Cell Biol* 2019; **21**:

- 372 978–990.
- 373 10. Kim D, Langmead B, Salzberg SL. HISAT: a fast spliced aligner with low memory  
374 requirements. *Nat Methods* 2015; **12**: 357–360.
- 375 11. Anders S, Pyl P, Huber W. HTSeq—A Python framework to work with high-throughput  
376 sequencing data. *Bioinformatics* 2014; **31**: 166–169.
- 377 12. Anders S, Huber W. Differential expression analysis for sequence count data. *Genome*  
378 *Biol* 2010; **11**: R106.
- 379 13. Veschi V, Liu Z, Voss T, Ozbun L, Gryder B, Yan C *et al*. Epigenetic siRNA and Chemical  
380 Screens Identify SETD8 Inhibition as a Therapeutic Strategy for p53 Activation in  
381 High-Risk Neuroblastoma. *Cancer Cell* 2017; **31**: 50–63.
- 382 14. Yang Y, Wang L, Han X, Yang WL, Zhang M, Ma HL *et al*. RNA 5-Methylcytosine Facilitates  
383 the Maternal-to-Zygotic Transition by Preventing Maternal mRNA Decay. *Mol Cell* 2019;  
384 **75**: 1188–1202 e1111.
- 385 15. Hafner M, Landthaler M, Burger L, Khorshid M, Hausser J, Berninger P *et al*.  
386 Transcriptome-wide identification of RNA-binding protein and microRNA target sites by  
387 PAR-CLIP. *Cell* 2010; **141**: 129–141.
- 388 16. Hafner M, Landthaler M, Burger L, Khorshid M, Hausser J, Berninger P *et al*. PAR-CLIP--a  
389 method to identify transcriptome-wide the binding sites of RNA binding proteins. *J Vis*  
390 *Exp* 2010; **41**: e2034.
- 391 17. Li A, Chen YS, Ping XL, Yang X, Xiao W, Yang Y *et al*. Cytoplasmic m(6)A reader YTHDF3  
392 promotes mRNA translation. *Cell Res* 2017; **27**: 444–447.
- 393 18. Langmead B, Trapnell C, Pop M, Salzberg SL. Ultrafast and memory-efficient alignment

- 394 of short DNA sequences to the human genome. *Genome Biol* 2009; **10**: R25.
- 395 19. Corcoran DL, Georgiev S, Mukherjee N, Gottwein E, Skalsky RL, Keene JD *et al.* PARalyzer:  
396 definition of RNA binding sites from PAR-CLIP short-read sequence data. *Genome Biol*  
397 2011; **12**: R79.
- 398 20. Robinson J, Thorvaldsdóttir H, Winckler W, Guttman M, Lander E, Getz G *et al.*  
399 Integrated Genomics Viewer. *Nat biotechnol* 2011; **29**: 24–26.
- 400 21. Huang H, Weng H, Sun W, Qin X, Shi H, Wu H *et al.* Recognition of RNA  
401 N(6)-methyladenosine by IGF2BP proteins enhances mRNA stability and translation. *Nat*  
402 *Cell Biol* 2018; **20**: 285–295.
- 403 22. Li S, Olson WK, Lu XJ. Web 3DNA 2.0 for the analysis, visualization, and modeling of 3D  
404 nucleic acid structures. *Nucleic Acids Res* 2019; **47**: W26–W34.
- 405 23. Yan Y, Zhang D, Zhou P, Li B, Huang SY. HDOCK: a web server for protein-protein and  
406 protein-DNA/RNA docking based on a hybrid strategy. *Nucleic Acids Res* 2017; **45**:  
407 W365–W373.
- 408 24. Piovesan D, Minervini G, Tosatto SC. The RING 2.0 web server for high quality residue  
409 interaction networks. *Nucleic Acids Res* 2016; **44**: W367–374.
- 410 25. Heinz S, Benner C, Spann N, Bertolino E, Lin YC, Laslo P *et al.* Simple combinations of  
411 lineage-determining transcription factors prime cis-regulatory elements required for  
412 macrophage and B cell identities. *Mol Cell* 2010; **38**: 576–589.
- 413 26. Li J, Chen Z, Tian L, Zhou C, He MY, Gao Y *et al.* LncRNA profile study reveals a  
414 three-lncRNA signature associated with the survival of patients with oesophageal  
415 squamous cell carcinoma. *Gut* 2014; **63**: 1700–1710.
- 416

# Su et al. Supplementary Figure 1

**A**

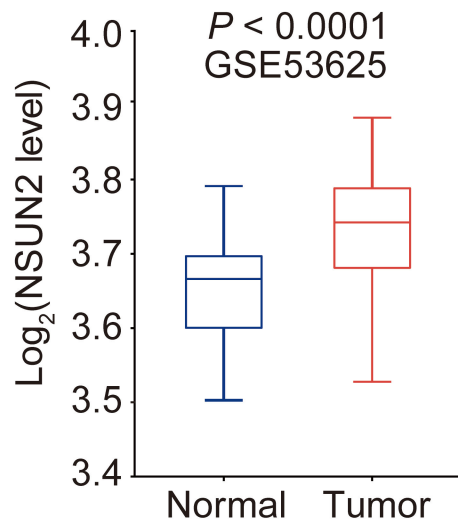

**B**

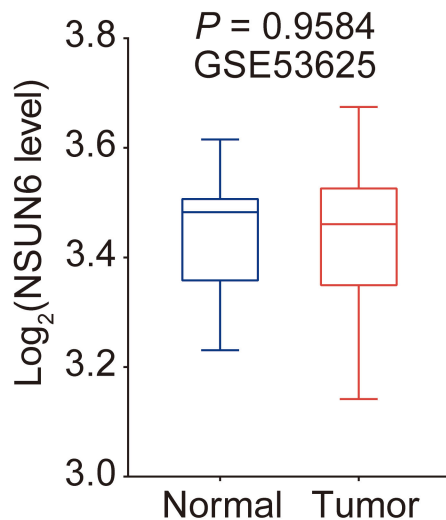

**Supplementary Fig. 1 Expression levels of *NSUN2* and *NSUN6* in patients with ESCC. Related to Fig. 1.**

(A–B) RNA levels of *NSUN2* (A) but not *NSUN6* (B) were significantly higher in ESCC tumors than in paired normal tissues from a public microarray dataset (GSE53625) of 179 paired ESCC cohort. Data are represented as boxplots. The centerlines of the box represent median, while the upper and lower hinges indicate 25th and 75th percentiles, respectively. *P*-values were calculated by two-sided paired *t* test.

# Su et al. Supplementary Figure 2

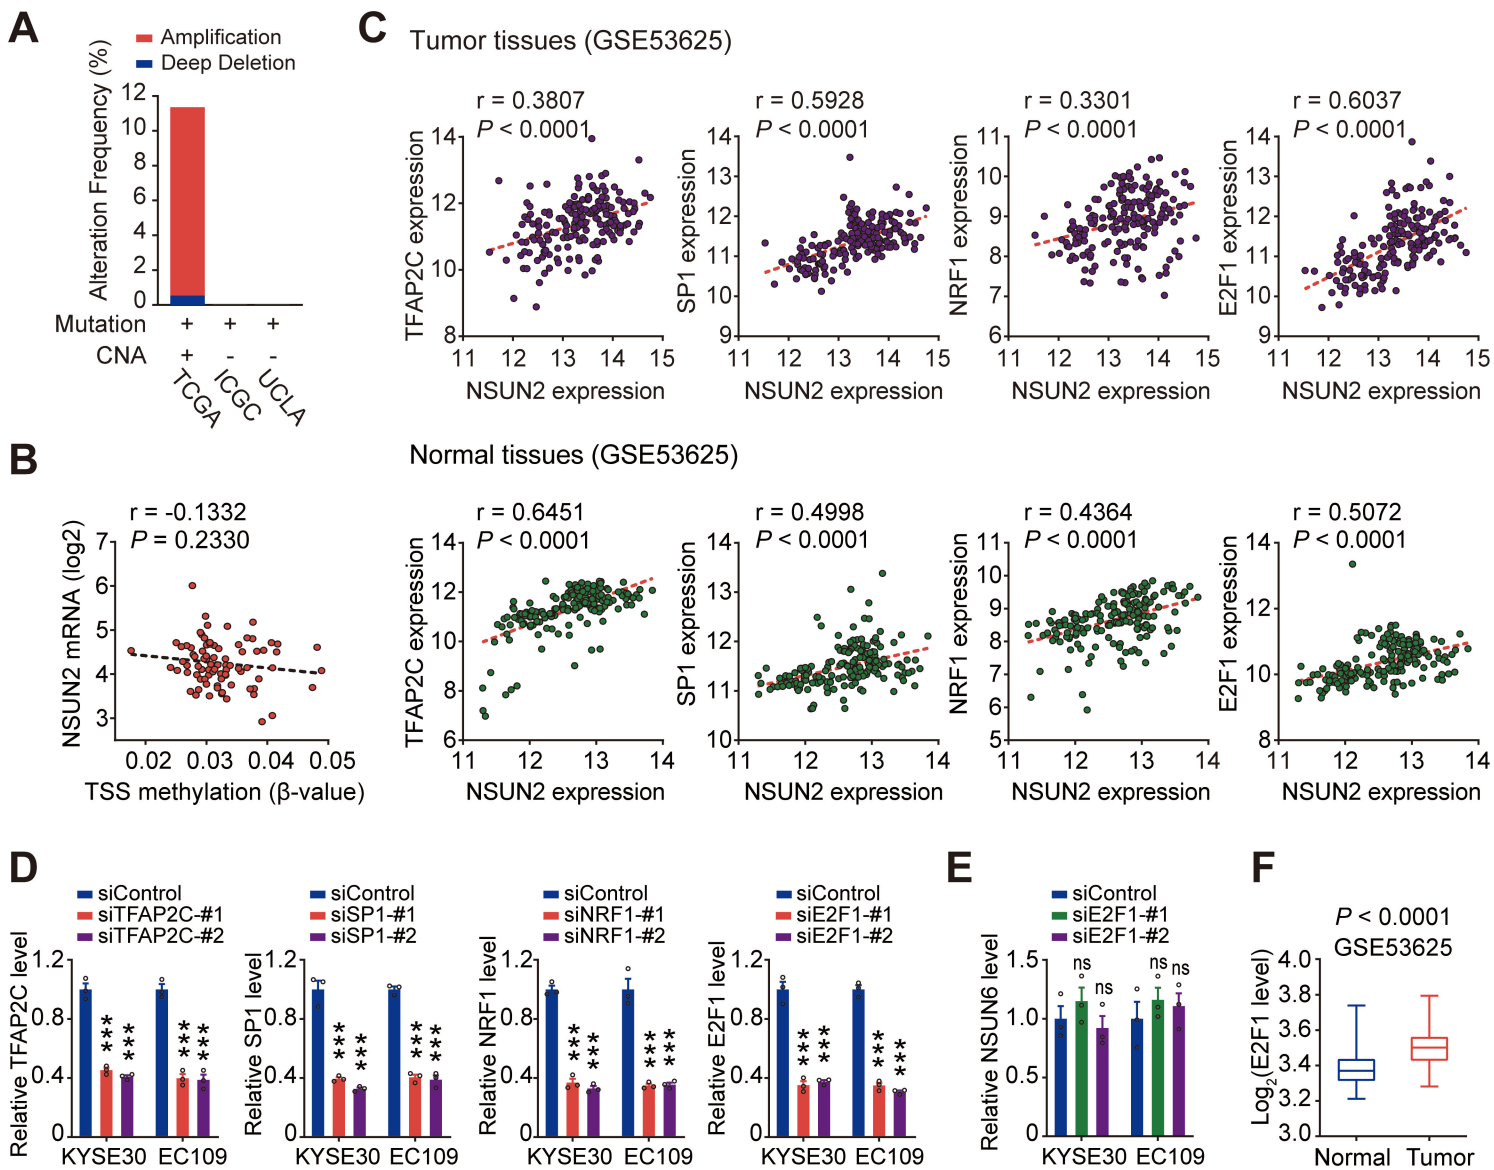



**Supplementary Fig. 2 Correlation between expressions of potential transcription factors and *NSUN2* at mRNA levels. Related to Fig. 2.**

(A) Copy number or mutation of *NSUN2*. Both *NSUN2* mutation and amplification are null or very rare in patients reported in International Cancer Genome Consortium (ICGC), University of California at Los Angeles (UCLA) and the TCGA project. (B) No correlation between *NSUN2* gene methylation status and mRNA levels from the TCGA ESCC data ( $n = 82$ ). (C) Spearman's correlations between expressions of suggested transcription factors and *NSUN2* at mRNA levels in a public microarray dataset (GSE53625) of ESCC tumors ( $n = 179$ , upper panel) or non-tumor tissues ( $n = 179$ , lower panel). (D) siRNA silencing efficiencies of *TFAP2C*, *SP1*, *NRF1*, or *E2F1* expression. (E) Relative *NSUN6* RNA levels in ESCC cells with or without knockdown of *E2F1*. (F) *E2F1* RNA levels were significantly higher in ESCC tumors than in paired normal tissues from a public microarray dataset (GSE53625) of 179 paired ESCC cohort. Results in (D–E) are mean  $\pm$  SEM from 3 independent experiments. Data represent as boxplots in (F); the centerline represents the median, while the upper and lower hinges indicate the 25th and 75th percentiles, respectively.  $P$ -values were calculated using two-sided Student's  $t$  test in (D–E) and two-sided paired  $t$  test in (F). \* $P < 0.05$ , \*\* $P < 0.01$ , \*\*\* $P < 0.001$ , ns, not significant.

# Su et al. Supplementary Figure 3

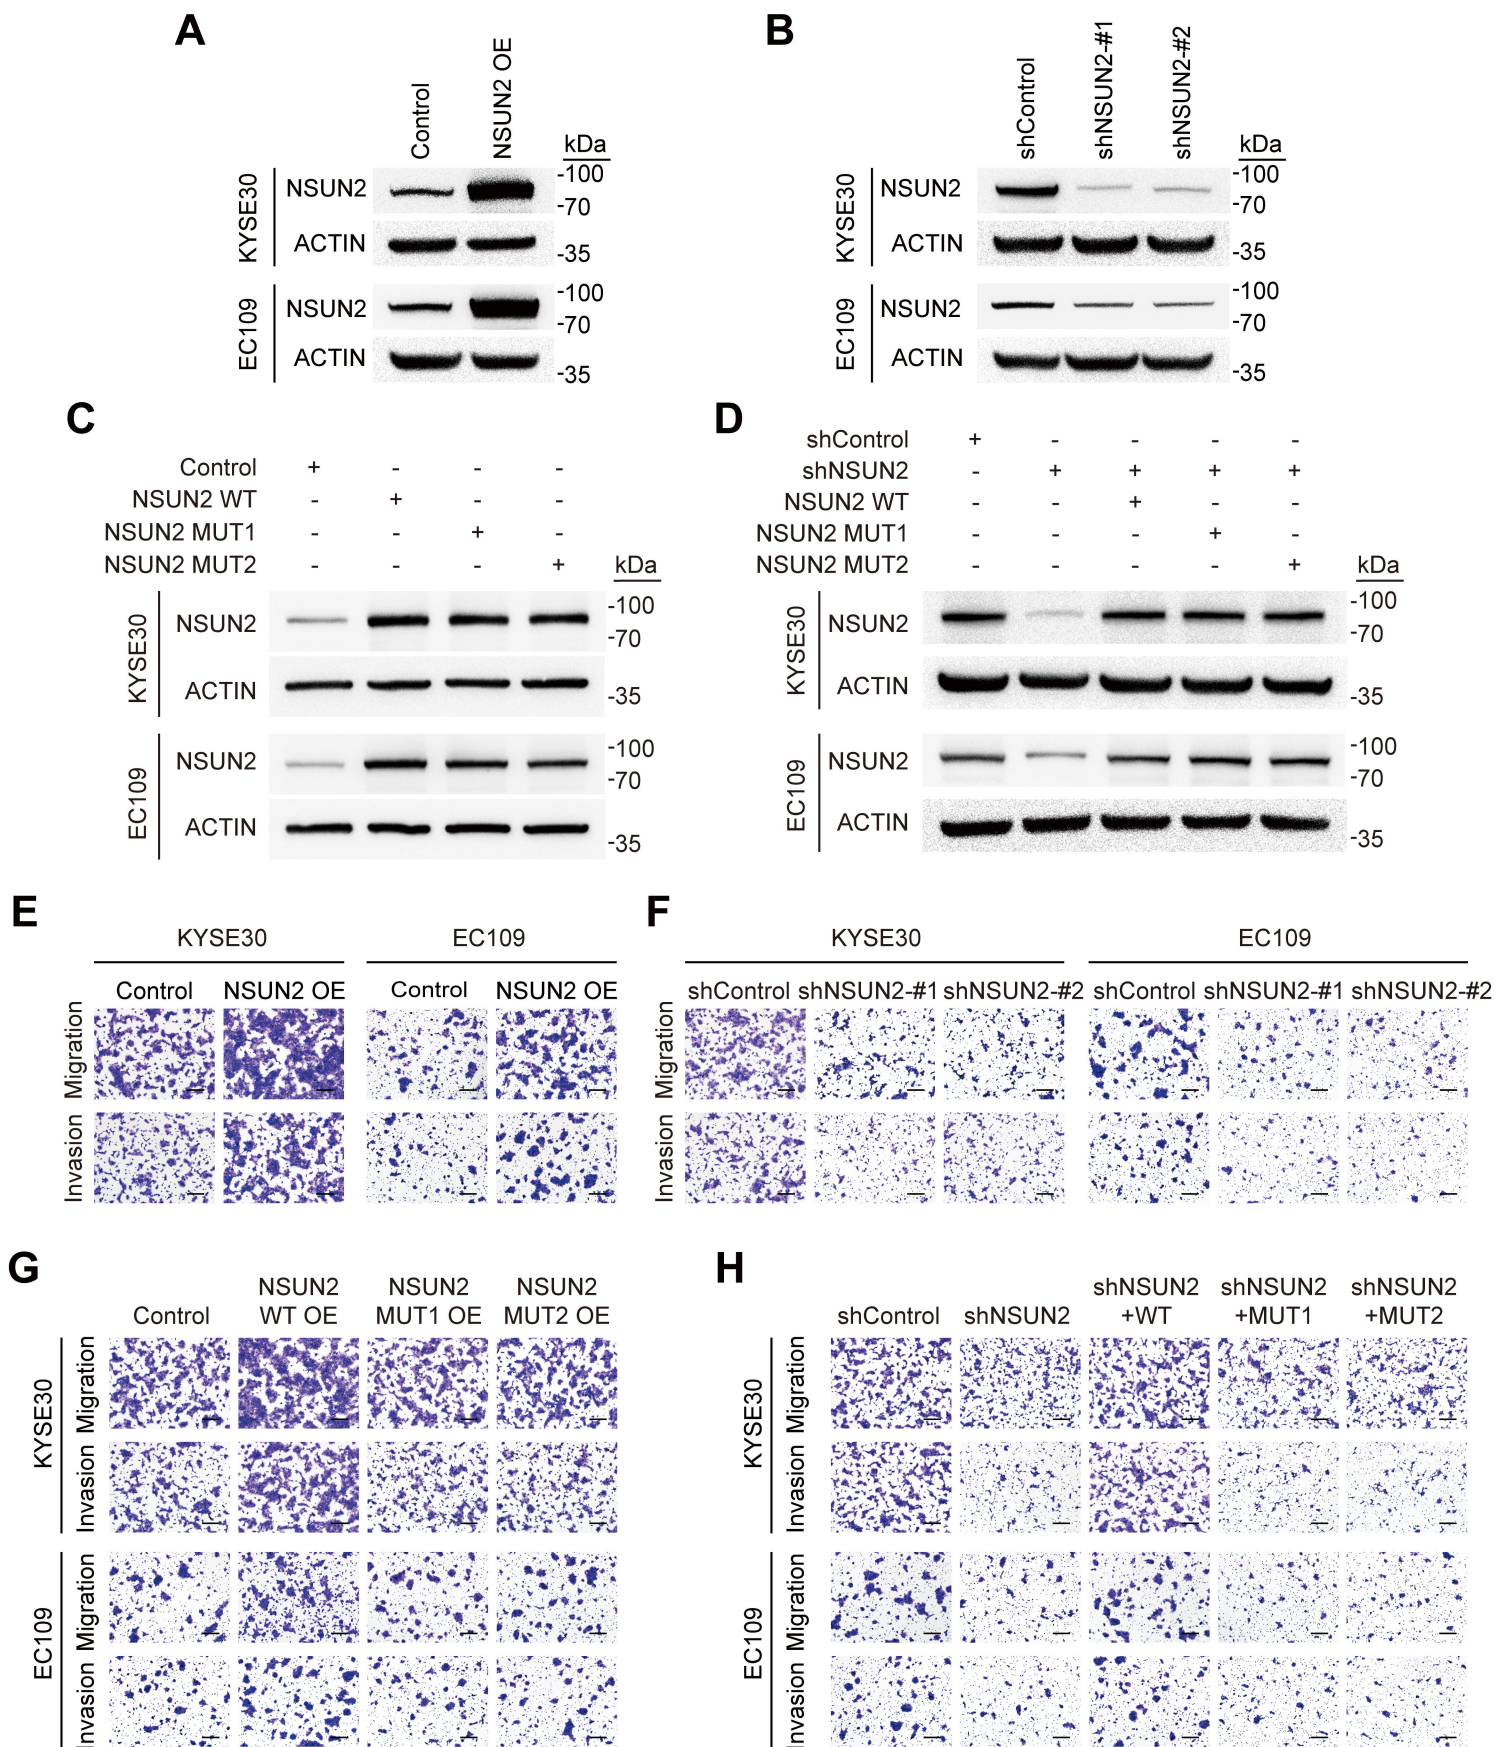

**Supplementary Fig. 3 Effects of NSUN2 on ESCC cell migration and invasion. Related to Fig. 3.** (A–D) Efficiency of *NSUN2* overexpression (A), knockdown (B), wild-type or mutant *NSUN2* overexpression (C) in ESCC cells, and *NSUN2*-depleted cells rescued with overexpression of wild-type or mutant *NSUN2* (D). ACTIN served as a control. (E–F) Representative pictures showing the effects of *NSUN2* overexpression (E) or knockdown (F) on migration and invasion of ESCC cells. (G–H) Representative images indicating that wild-type but not mutant *NSUN2* enhanced migration and invasion of ESCC cells (G) and reversed the inhibition of migration and invasion caused by *NSUN2* knockdown (H). Scale bars, 200  $\mu$ m. Images were photographed from 3 random fields. WT, wild-type *NSUN2* plasmids; MUT1, *NSUN2* plasmids with a point mutation at catalytic site (C321A); MUT2, *NSUN2* plasmids with point mutations at both catalytic site (C321A) and releasing site (C271A), respectively. All three plasmids were insensitive to sh*NSUN2* plasmid. All data are from 3 independent experiments.

# Su et al. Supplementary Figure 4

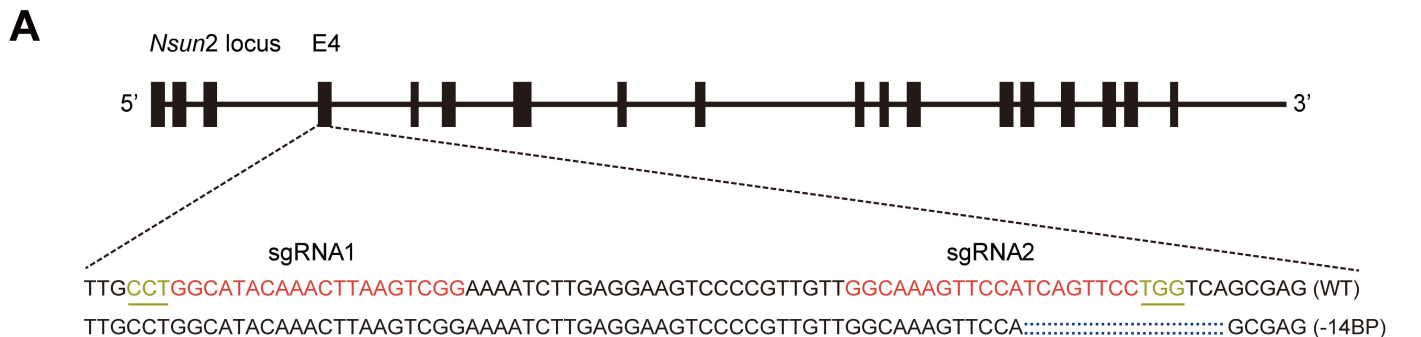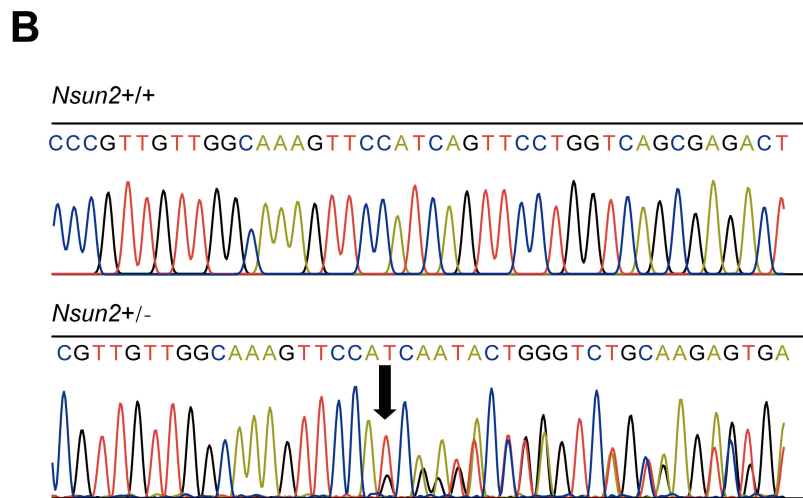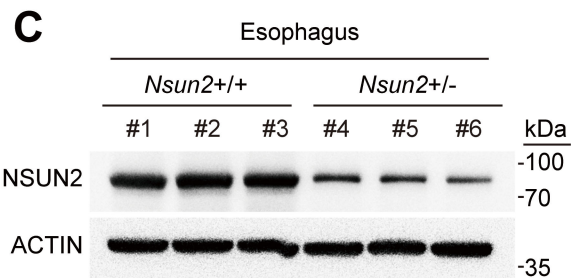

**D**

|                      | <i>Nsun2</i> <sup>+/+</sup> | <i>Nsun2</i> <sup>+/-</sup> |
|----------------------|-----------------------------|-----------------------------|
| Atypical hyperplasia | 0                           | 3                           |
| Carcinoma in situ    | 1                           | 6                           |
| Invasive carcinoma   | 9                           | 1                           |

**Supplementary Fig. 4 Validation of *Nsun2* knockout mice. Related to Fig. 3.**

(A) Schematic diagram of sgRNAs targeting the *Nsun2* locus. One *Nsun2* allele was disrupted by injecting Cas9 mRNAs and two small guide RNAs targeting the fourth exon of the gene into fertilized eggs. PAM sequences are underlined and highlighted in yellow. sgRNA targeting sites are in red. The 14-bp shift due to the deletion mutation is in blue. (B) Sanger sequencing of mouse tail DNA PCR amplification products confirming the 14-bp shift due to the deletion mutation of *Nsun2*. The deleted nucleotides are indicated with black arrow. (C) Western blotting analysis of esophageal tissues from *Nsun2*<sup>+/+</sup> and *Nsun2*<sup>+/-</sup> mice confirming the decreased expression of NSUN2 protein. Analysis was performed once with three mice per genotype. ACTIN was used as a control. (D) Number of mice with different pathological degree of esophageal masses in *Nsun2*<sup>+/+</sup> mice and their *Nsun2*<sup>+/-</sup> littermates after 4-NQO withdrawal for 12 weeks.

# Su et al. Supplementary Figure 5

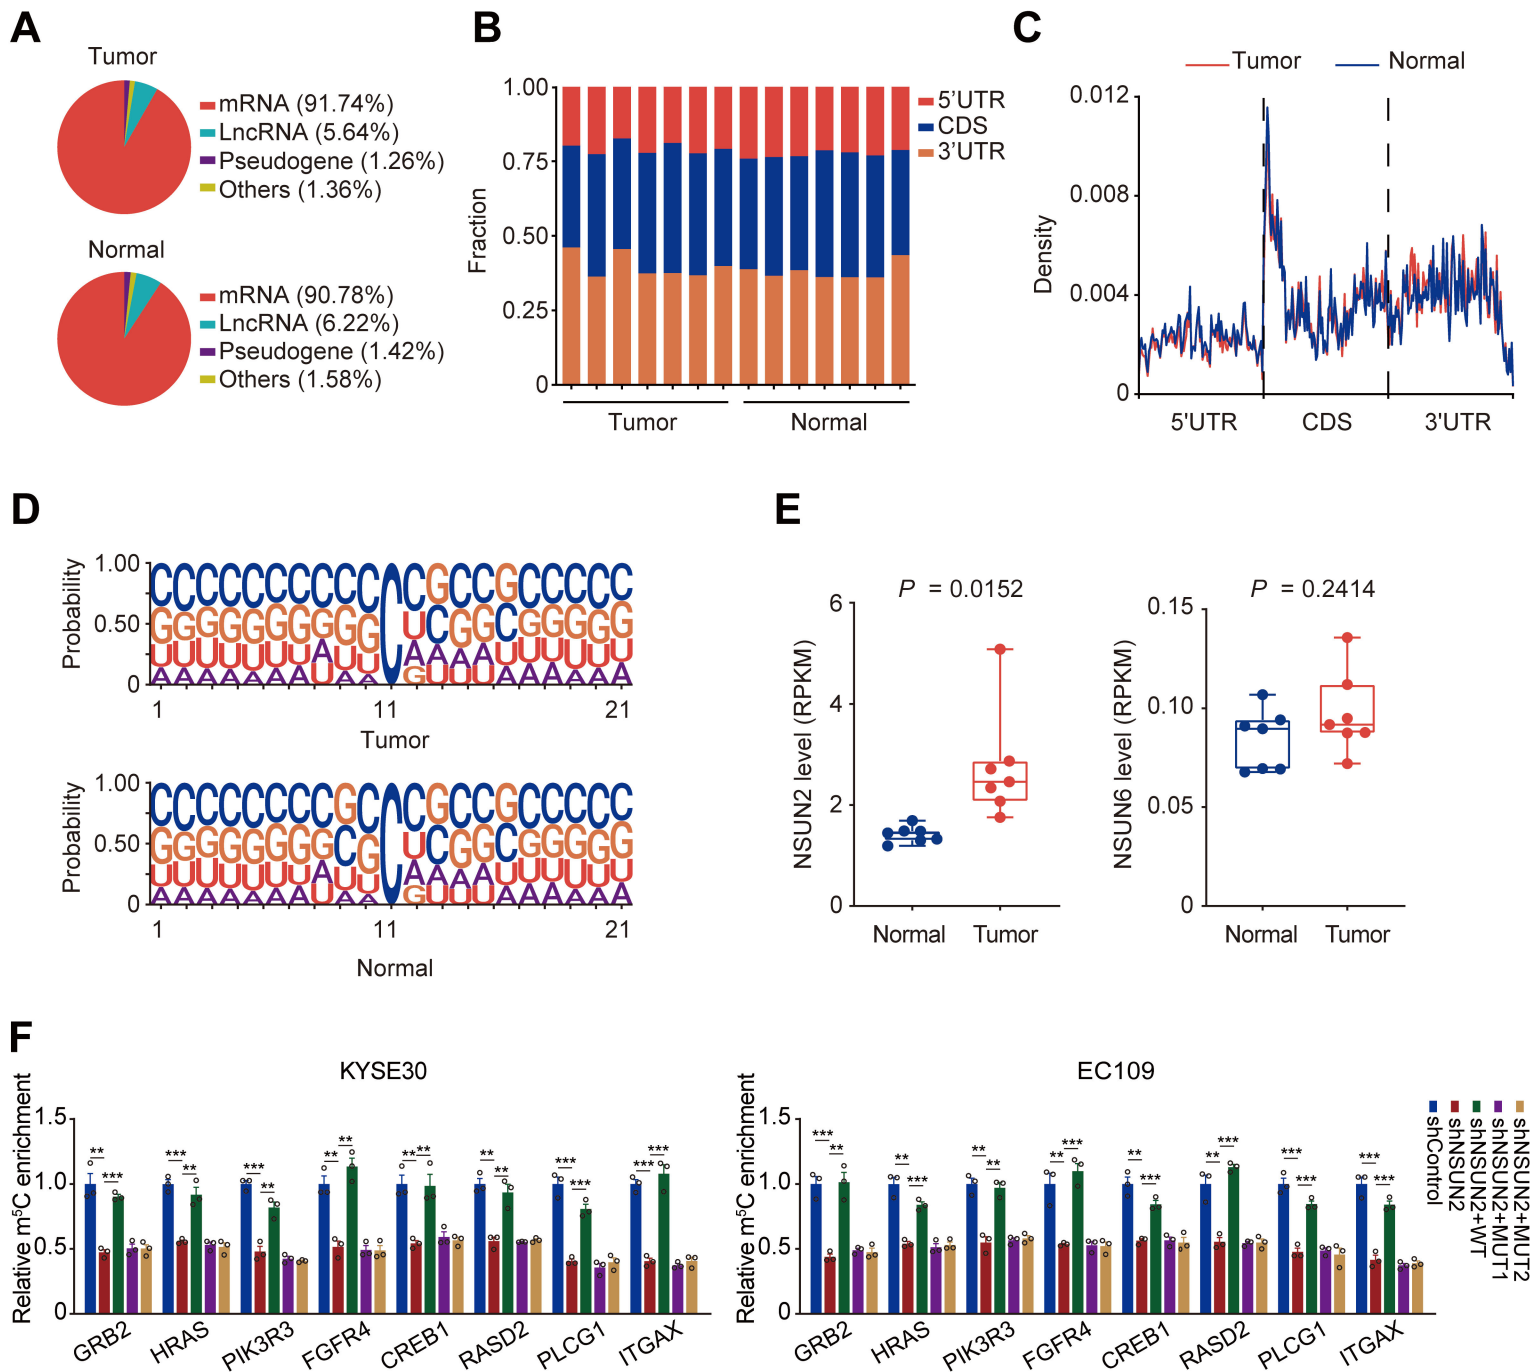

**Supplementary Fig. 5 Distribution profiles of RNA m<sup>5</sup>C modification in human ESCC. Related to Fig. 4.**

(A) The proportion of RNA categories with m<sup>5</sup>C sites in ESCC tumors and paired normal samples. (B) Transcriptome-wide distribution of mRNA m<sup>5</sup>C sites in the CDS, 5'UTR and 3'UTR of mRNA transcripts in ESCC tumors and paired normal samples. (C) Metagene profiles showing the m<sup>5</sup>C methylation density along transcripts identified in ESCC tumors and paired normal samples. (D) Sequence context of m<sup>5</sup>C sites identified in ESCC tumors and paired normal samples. (E) Aberrant overexpression of *NSUN2* but not *NSUN6* RNA in ESCC tumors than in paired normal tissues by RNA-Seq ( $n = 7$ ). (F) Wild-type but not mutant *NSUN2* reversed the decreased m<sup>5</sup>C levels of genes involved in cancer-related pathways caused by *NSUN2* depletion using m<sup>5</sup>C-RIP-qPCR from 3 independent experiments.  $P$ -values are calculated by two-sided paired  $t$  test in (E) and by two-sided Student's  $t$  test in (F) (\* $P < 0.05$ , \*\* $P < 0.01$  and \*\*\* $P < 0.001$ ).

# Su et al. Supplementary Figure 6

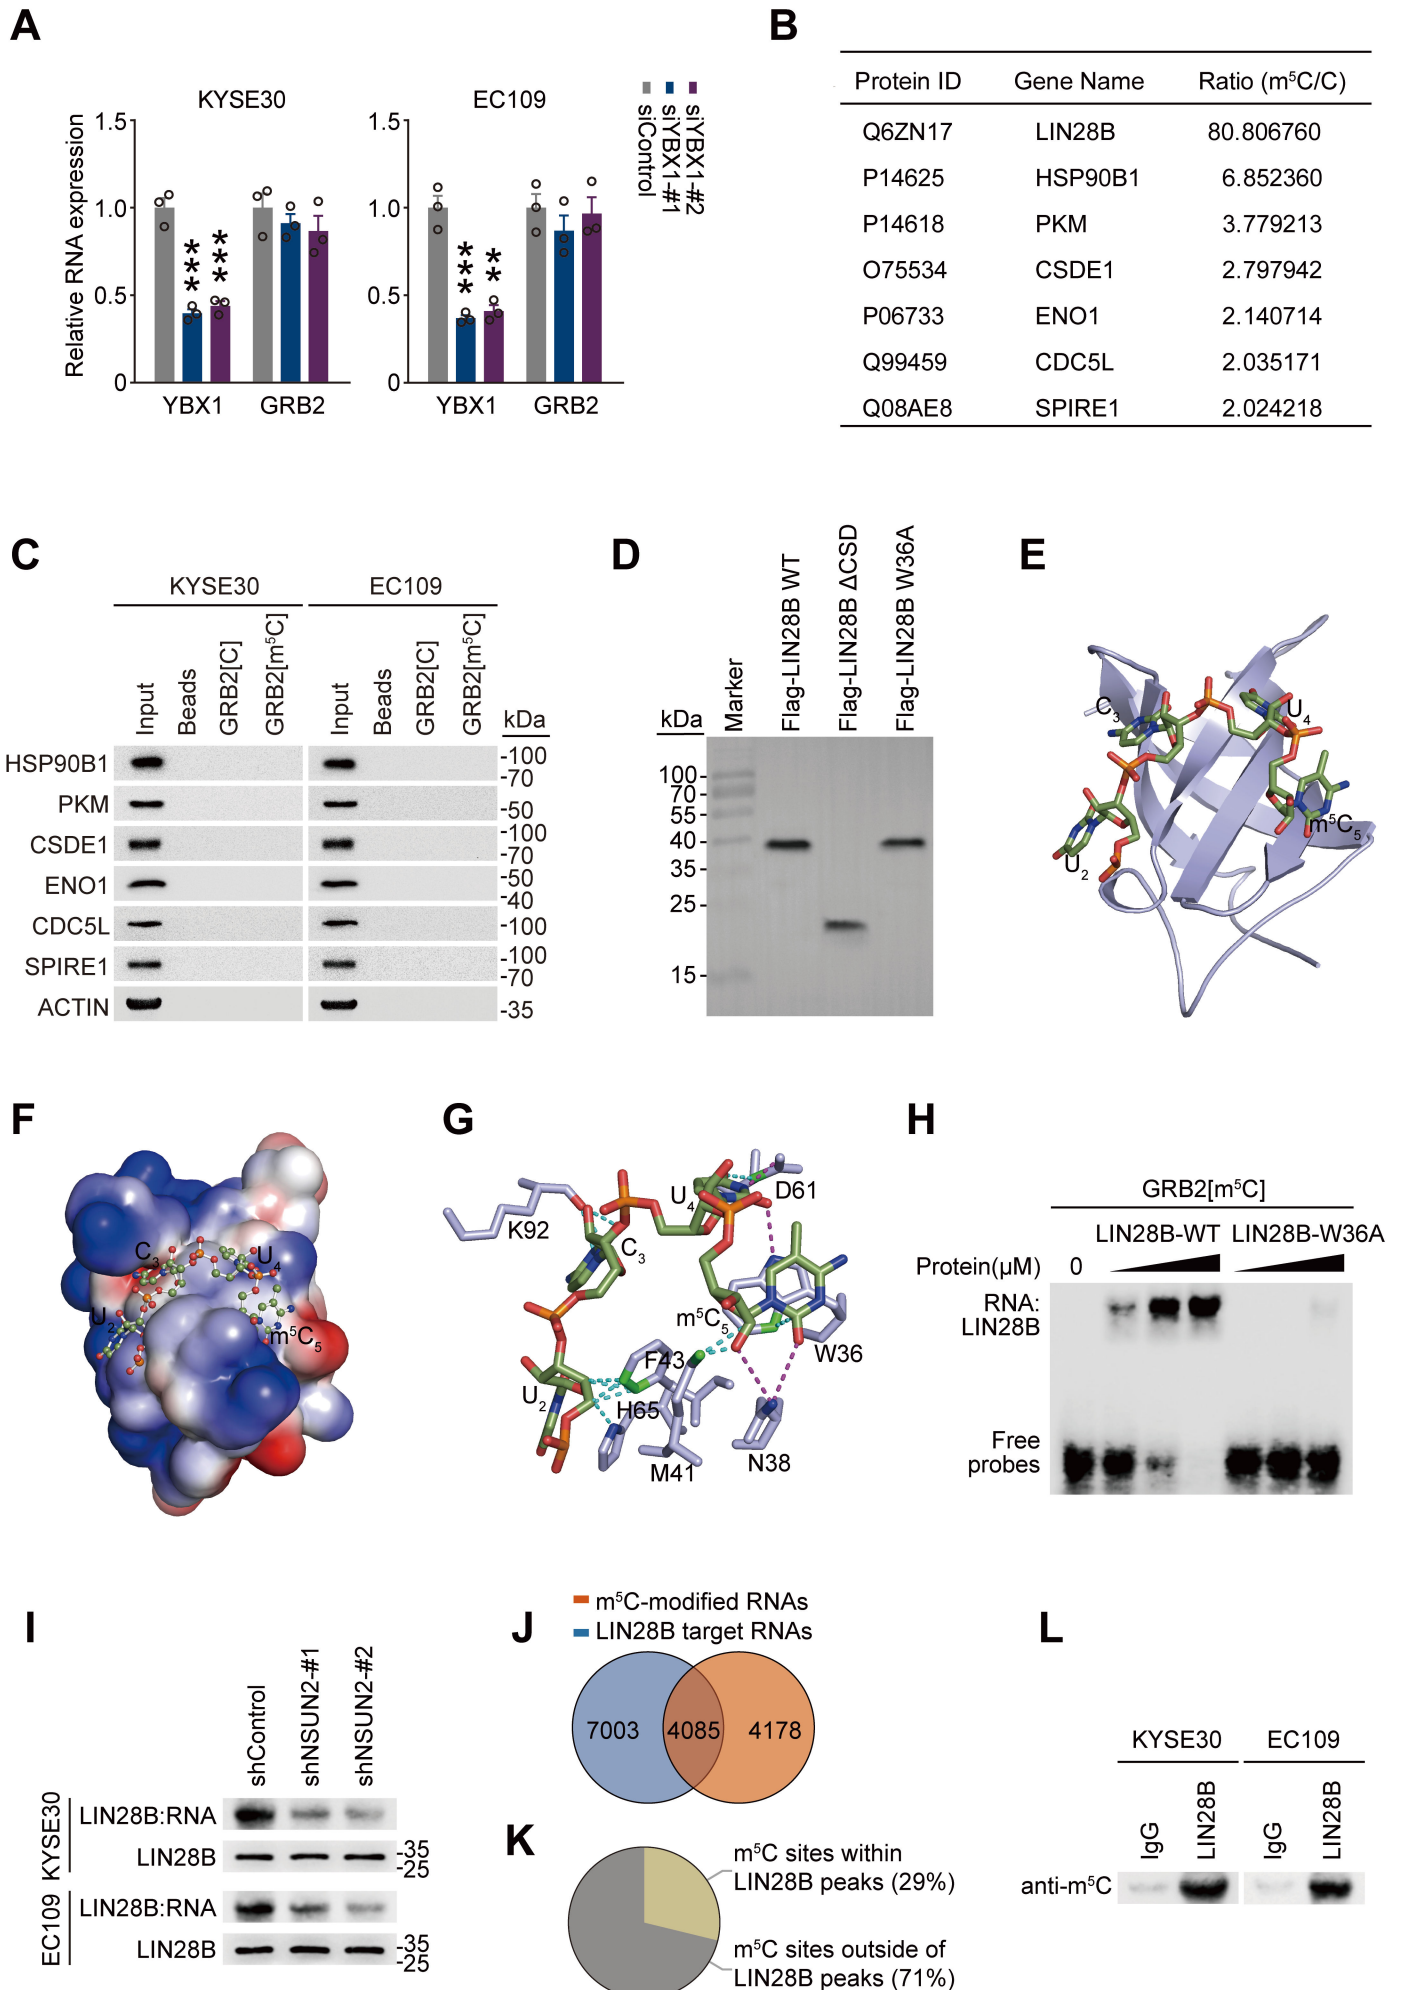



**Supplementary Fig. 6 Validation of the binding abilities of potential *GRB2*[m<sup>5</sup>C] binding proteins to methylated or unmethylated *GRB2* probes. Related to Fig. 6.**

(A) *YBX1* silencing efficiency and its effect on *GRB2* expression by qRT-PCR from 3 independent experiments. *P*-values are calculated by two-sided Student's *t* test (\**P* < 0.05, \*\**P* < 0.01 and \*\*\**P* < 0.001). (B) List of proteins with higher *GRB2*[m<sup>5</sup>C] binding affinity identified by RNA pulldown followed by mass spectrometry analysis. The filter criteria are unique peptides > 10, ratio of average LFQ intensity of *GRB2*[m<sup>5</sup>C] and *GRB2*[C] > 2. (C) Western blotting analysis of potential *GRB2*[m<sup>5</sup>C] binding proteins obtained from RNA pulldown followed by mass spectrometry analysis. (D) Western blotting showing the Flag-tagged wild-type (WT) and mutant (CSD truncated or W36A) LIN28B proteins. Positions of molecular markers are indicated on the left panel. (E) An overall view of the LIN28B CSD domain in complex with the *GRB2* m<sup>5</sup>C RNA oligo. The LIN28B CSD domain is displayed as a purple ribbon, and the *GRB2* m<sup>5</sup>C RNA oligo is shown as a stick model. (F) Electrostatic potential of the surface of LIN28B CSD in complex with the *GRB2* m<sup>5</sup>C RNA oligo. (G) Recognition of m<sup>5</sup>C by the LIN28B CSD domain. (H) REMSA assays of *GRB2*[m<sup>5</sup>C] probes with purified FLAG-tagged LIN28B (wild-type or W36A mutants). (I) PAR-CLIP assays of LIN28B protein in control and *NSUN2*-deficient ESCC cells. The LIN28B pull-down RNAs were labelled with biotin and visualized by the chemiluminescent nucleic acid detection module. (J–K) Overlay of LIN28B-binding RNAs with m<sup>5</sup>C-modified RNAs (J) and distributions of m<sup>5</sup>C sites within and outside of LIN28B binding peaks (K) as determined by LIN28B PAR-CLIP-Seq and RNA-BisSeq. (L) PAR-CLIP assays of m<sup>5</sup>C-modified RNAs pulled down by LIN28B in ESCC cells. The LIN28B-bound RNAs were incubated with anti-m<sup>5</sup>C antibody and visualized by chemiluminescent assays.

# Su et al. Supplementary Figure 7

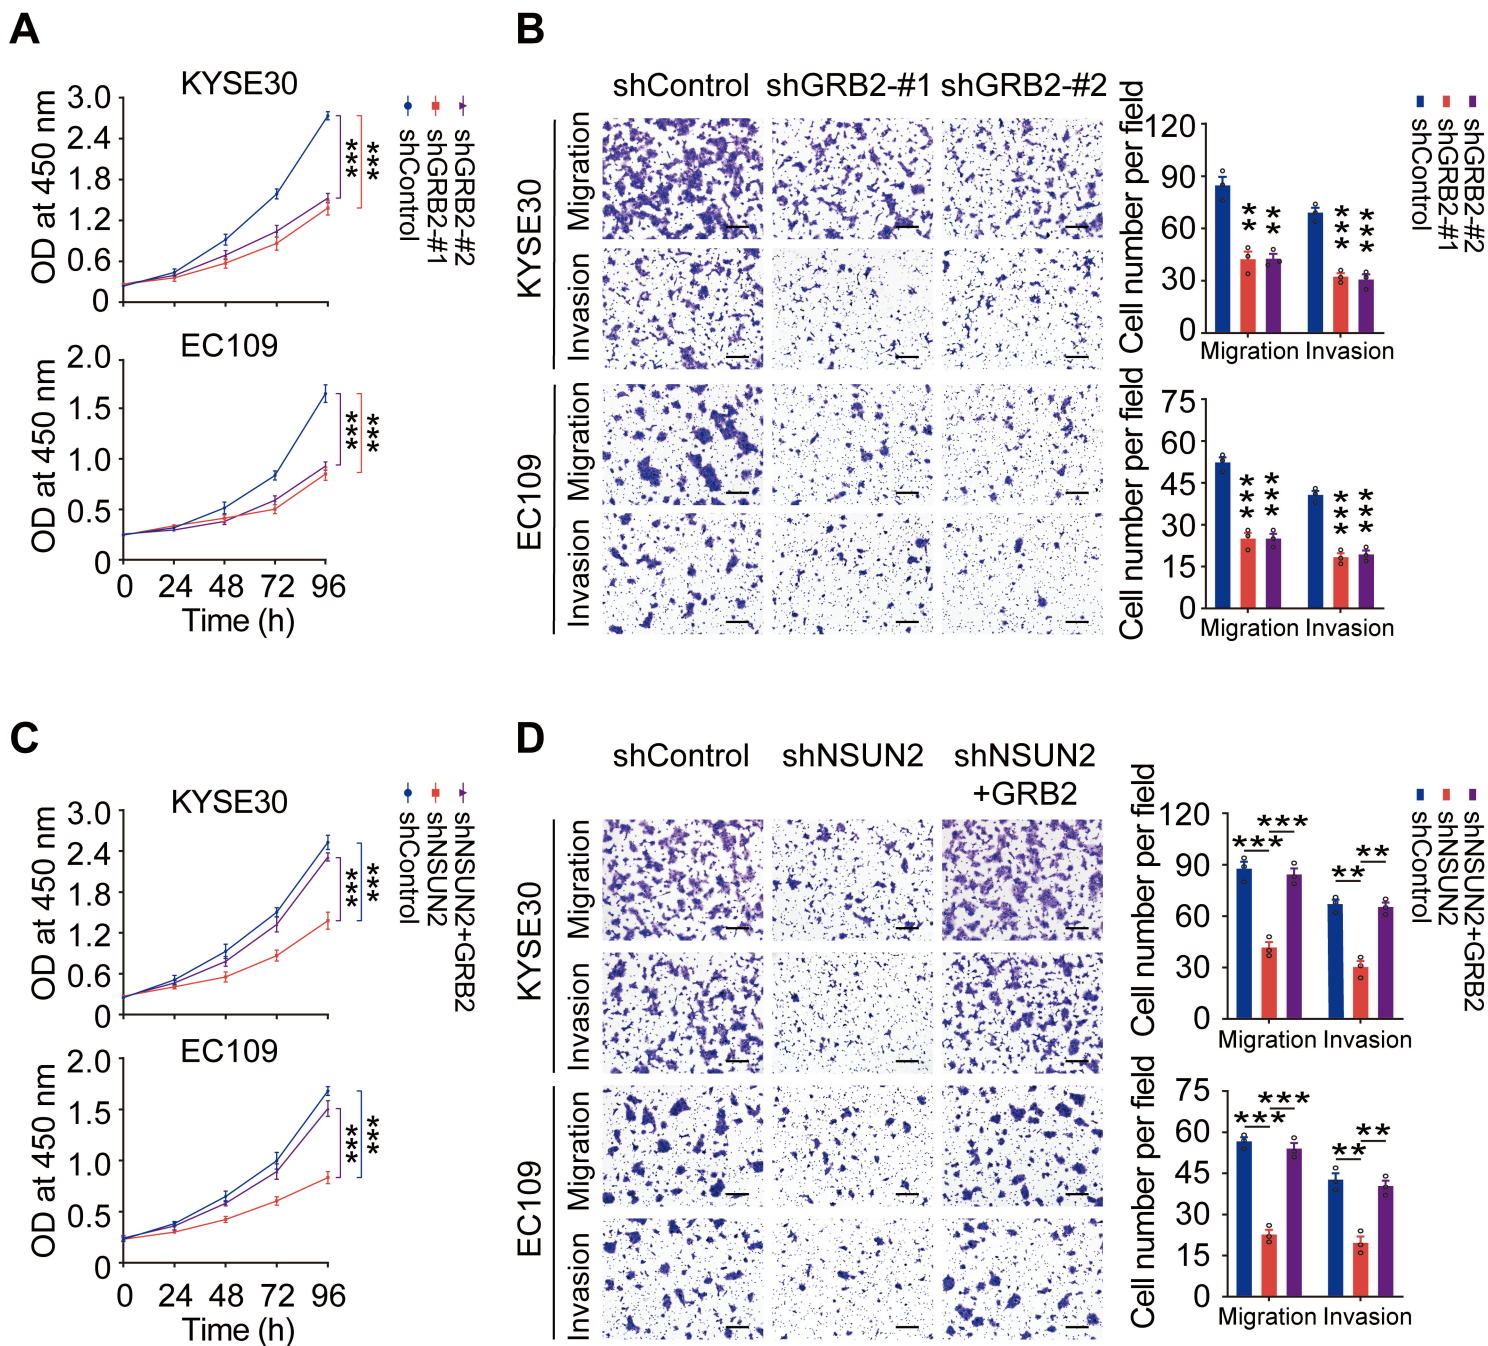

**Supplementary Fig. 7 Effects of NSUN2-GRB2 axis on malignant cell phenotypes of ESCC cells. Related to Fig. 7.**

(A–B) Effects of *GRB2* knockdown on abilities of ESCC cell proliferation (A), migration and invasion (B). (C–D) Overexpression of *GRB2* significantly reversed the inhibitory effects of *NSUN2* knockdown on ESCC cell proliferation (C), migration and invasion (D). The left panel shows representative images of cell migration and invasion, and the right panel shows quantitative statistics in (B) and (D). All results represent as mean  $\pm$  SEM of at least three independent experiments. Images were photographed from 3 random fields. \* $P < 0.05$ , \*\* $P < 0.01$  and \*\*\* $P < 0.001$  of two-sided Student's *t* test.

**Supplementary Table 1.** Baseline demographic and clinical characteristics of individuals with ESCC used for qRT-PCR and m<sup>5</sup>C-RIP-qPCR in this study.

| Variable                                | All cases<br>(N = 215) | Alive<br>(N = 93) | Deceased<br>(N = 122) | P value <sup>d</sup> |
|-----------------------------------------|------------------------|-------------------|-----------------------|----------------------|
| Age(years), mean (S.E.M. <sup>a</sup> ) | 60.09 (0.62)           | 59.86 (0.88)      | 60.27 (0.87)          | 0.744                |
| Sex, N (%)                              |                        |                   |                       | 0.115                |
| Male                                    | 166 (77.2)             | 67 (72.0)         | 99 (81.1)             |                      |
| Female                                  | 49 (22.8)              | 26 (28.0)         | 23 (18.9)             |                      |
| Family history, N (%)                   |                        |                   |                       | 0.631                |
| Yes                                     | 52 (24.2)              | 21 (22.6)         | 31 (25.4)             |                      |
| No                                      | 163 (75.8)             | 72 (77.4)         | 91 (74.6)             |                      |
| Smoking status <sup>b</sup> , N (%)     |                        |                   |                       | 0.351                |
| Ever                                    | 137 (63.7)             | 56 (60.2)         | 81 (66.4)             |                      |
| Never                                   | 78 (36.3)              | 37 (39.8)         | 41 (33.6)             |                      |
| Drinking status <sup>b</sup> , N (%)    |                        |                   |                       | 0.460                |
| Ever                                    | 94 (43.7)              | 38 (40.9)         | 56 (45.9)             |                      |
| Never                                   | 121 (56.3)             | 55 (59.1)         | 66 (54.1)             |                      |
| Differentiation, N (%)                  |                        |                   |                       | 0.858                |
| Well                                    | 37 (17.2)              | 17 (18.3)         | 20 (16.4)             |                      |
| Moderate                                | 114 (53.0)             | 50 (53.8)         | 64 (52.5)             |                      |
| Poor                                    | 64 (29.8)              | 26 (27.9)         | 38 (31.1)             |                      |
| Tumor stage <sup>c</sup> , N (%)        |                        |                   |                       | < 0.0001             |
| I                                       | 13 (6.0)               | 8 (8.6)           | 5 (4.1)               |                      |
| II                                      | 93 (43.3)              | 54 (58.1)         | 39 (32.0)             |                      |
| III                                     | 101 (47.0)             | 28 (30.1)         | 73 (59.8)             |                      |
| IV                                      | 8 (3.7)                | 3 (3.2)           | 5 (4.1)               |                      |
| Treatment, N (%)                        |                        |                   |                       | 0.283                |
| Surgery Only                            | 203 (94.4)             | 87 (93.5)         | 116 (95.1)            |                      |
| Surgery + Chemotherapy                  | 5 (2.3)                | 3 (3.2)           | 2 (1.6)               |                      |
| Surgery + Radiotherapy                  | 2 (1.0)                | 2 (2.2)           | 0 (0.0)               |                      |
| Surgery + Chemoradiotherapy             | 5 (2.3)                | 1 (1.1)           | 4 (3.3)               |                      |

<sup>a</sup>S.E.M., standard error of mean.

<sup>b</sup>Individuals who smoked an average of <1 cigarette/day and for <1 year in their lifetime were defined as nonsmokers; otherwise, they were defined as smokers. Individuals were classified as drinkers if they drank at least twice a week and continuously for at least 1 year during their lifetime; otherwise, they were defined as nondrinkers.

<sup>c</sup>Tumor staging were reviewed by at least 3 pathologists and defined according to the American Joint Committee on Cancer (AJCC) 7th edition.

<sup>d</sup>P value was calculated by two-sided Chi-square test.

**Supplementary Table 2.** Associations between *NSUN2*, *GRB2* RNA level or *GRB2* m<sup>5</sup>C level and clinical characteristics of individuals with ESCC used for qRT-PCR and m<sup>5</sup>C-RIP-qPCR in this study.

| Variable                                | All cases<br>(N = 215) | Low NSUN2<br>RNA level <sup>d</sup><br>(N = 107) | High NSUN2<br>RNA level <sup>d</sup><br>(N = 108) | P value <sup>e</sup> | Low GRB2<br>RNA level <sup>d</sup><br>(N = 107) | High GRB2<br>RNA level <sup>d</sup><br>(N = 108) | P value <sup>e</sup> | Low GRB2<br>m <sup>5</sup> C level <sup>d</sup><br>(N = 107) | High GRB2<br>m <sup>5</sup> C level <sup>d</sup><br>(N = 108) | P value <sup>e</sup> |
|-----------------------------------------|------------------------|--------------------------------------------------|---------------------------------------------------|----------------------|-------------------------------------------------|--------------------------------------------------|----------------------|--------------------------------------------------------------|---------------------------------------------------------------|----------------------|
| Age(years), mean (S.E.M. <sup>a</sup> ) | 60.09 (0.62)           | 59.83 (0.83)                                     | 60.35 (0.92)                                      | 0.676                | 60.90 (0.88)                                    | 59.3 (0.87)                                      | 0.197                | 60.51 (0.81)                                                 | 59.68 (0.94)                                                  | 0.500                |
| Sex, N (%)                              |                        |                                                  |                                                   | 0.395                |                                                 |                                                  | 0.134                |                                                              |                                                               | 0.134                |
| Male                                    | 166 (77.2)             | 80 (74.8)                                        | 86 (79.6)                                         |                      | 78 (72.9)                                       | 88 (81.5)                                        |                      | 78 (72.9)                                                    | 88 (81.5)                                                     |                      |
| Female                                  | 49 (22.8)              | 27 (25.2)                                        | 22 (20.4)                                         |                      | 29 (27.1)                                       | 20 (18.5)                                        |                      | 29 (27.1)                                                    | 20 (18.5)                                                     |                      |
| Family history, N (%)                   |                        |                                                  |                                                   | 0.320                |                                                 |                                                  | 0.120                |                                                              |                                                               | 0.359                |
| Yes                                     | 52 (24.2)              | 29 (27.1)                                        | 23 (21.3)                                         |                      | 21 (19.6)                                       | 31 (28.7)                                        |                      | 23 (21.5)                                                    | 29 (26.9)                                                     |                      |
| No                                      | 163 (75.8)             | 78 (72.9)                                        | 85 (78.7)                                         |                      | 86 (80.4)                                       | 77 (71.3)                                        |                      | 84 (78.5)                                                    | 79 (73.1)                                                     |                      |
| Smoking status <sup>b</sup> , N (%)     |                        |                                                  |                                                   | 0.738                |                                                 |                                                  | 0.079                |                                                              |                                                               | 0.367                |
| Ever                                    | 137 (63.7)             | 67 (62.6)                                        | 70 (64.8)                                         |                      | 62 (57.9)                                       | 75 (69.4)                                        |                      | 65 (60.7)                                                    | 72 (66.7)                                                     |                      |
| Never                                   | 78 (36.3)              | 40 (37.4)                                        | 38 (35.2)                                         |                      | 45 (42.1)                                       | 33 (30.6)                                        |                      | 42 (39.3)                                                    | 36 (33.3)                                                     |                      |
| Drinking status <sup>b</sup> , N (%)    |                        |                                                  |                                                   | 0.444                |                                                 |                                                  | 0.624                |                                                              |                                                               | 0.952                |
| Ever                                    | 94 (43.7)              | 44 (41.1)                                        | 50 (46.3)                                         |                      | 45 (42.1)                                       | 49 (45.4)                                        |                      | 47 (43.9)                                                    | 47 (43.5)                                                     |                      |
| Never                                   | 121 (56.3)             | 63 (58.9)                                        | 58 (53.7)                                         |                      | 62 (57.9)                                       | 59 (54.6)                                        |                      | 60 (56.1)                                                    | 61 (56.5)                                                     |                      |
| Differentiation, N (%)                  |                        |                                                  |                                                   | 0.506                |                                                 |                                                  | 0.802                |                                                              |                                                               | 0.857                |
| Well                                    | 37 (17.2)              | 17 (15.9)                                        | 20 (18.5)                                         |                      | 17 (15.9)                                       | 20 (18.5)                                        |                      | 19 (17.8)                                                    | 18 (16.7)                                                     |                      |
| Moderate                                | 114 (53.0)             | 61 (57.0)                                        | 53 (49.1)                                         |                      | 59 (55.1)                                       | 55 (50.9)                                        |                      | 58 (54.2)                                                    | 56 (51.9)                                                     |                      |
| Poor                                    | 64 (29.8)              | 29 (27.1)                                        | 35 (32.4)                                         |                      | 31 (29.0)                                       | 33 (30.6)                                        |                      | 30 (28.0)                                                    | 34 (31.4)                                                     |                      |
| Tumor stage <sup>c</sup> , N (%)        |                        |                                                  |                                                   | 0.006                |                                                 |                                                  | 0.019                |                                                              |                                                               | 0.018                |
| I                                       | 13 (6.0)               | 9 (8.4)                                          | 4 (3.7)                                           |                      | 11 (10.3)                                       | 2 (1.9)                                          |                      | 9 (8.4)                                                      | 4 (3.7)                                                       |                      |
| II                                      | 93 (43.3)              | 56 (52.3)                                        | 37 (34.3)                                         |                      | 50 (46.7)                                       | 43 (39.8)                                        |                      | 55 (51.4)                                                    | 38 (35.2)                                                     |                      |
| III                                     | 101 (47.0)             | 40 (37.4)                                        | 61 (56.5)                                         |                      | 42 (39.3)                                       | 59 (54.6)                                        |                      | 40 (37.4)                                                    | 61 (56.5)                                                     |                      |
| IV                                      | 8 (3.7)                | 2 (1.9)                                          | 6 (5.5)                                           |                      | 4 (3.7)                                         | 4 (3.7)                                          |                      | 3 (2.8)                                                      | 5 (4.6)                                                       |                      |
| Treatment, N (%)                        |                        |                                                  |                                                   | 0.197                |                                                 |                                                  | 0.477                |                                                              |                                                               | 0.800                |
| Surgery Only                            | 203 (94.4)             | 98 (91.6)                                        | 105 (97.2)                                        |                      | 99 (92.6)                                       | 104 (96.3)                                       |                      | 102 (95.3)                                                   | 101 (93.5)                                                    |                      |

|                             |         |         |         |         |         |         |         |
|-----------------------------|---------|---------|---------|---------|---------|---------|---------|
| Surgery + Chemotherapy      | 5 (2.3) | 3 (2.8) | 2 (1.9) | 3 (2.8) | 2 (1.9) | 3 (2.8) | 2 (1.9) |
| Surgery + Radiotherapy      | 2 (1.0) | 2 (1.9) | 0 (0.0) | 1 (0.9) | 1 (0.9) | 0 (0.0) | 2 (1.9) |
| Surgery + Chemoradiotherapy | 5 (2.3) | 4 (3.7) | 1 (0.9) | 4 (3.7) | 1 (0.9) | 2 (1.9) | 3 (2.7) |

<sup>a</sup>S.E.M., standard error of mean.

<sup>b</sup>Individuals who smoked an average of <1 cigarette/day and for <1 year in their lifetime were defined as nonsmokers; otherwise, they were defined as smokers. Individuals were classified as drinkers if they drank at least twice a week and continuously for at least 1 year during their lifetime; otherwise, they were defined as nondrinkers.

<sup>c</sup>Tumor staging were reviewed by at least 3 pathologists and defined according to the American Joint Committee on Cancer (AJCC) 7th edition.

<sup>d</sup>High is defined as  $\geq$  median and low is as < median.

<sup>e</sup>*P* value was calculated by two-sided Chi-square test.

**Supplementary Table 3.** Univariate and multivariate Cox regression analysis for overall survival in ESCC patients.

| Variable                                          | Univariate |           |           | Multivariate    |                     |           |
|---------------------------------------------------|------------|-----------|-----------|-----------------|---------------------|-----------|
|                                                   | HR         | 95% CI    | P value   | HR <sup>a</sup> | 95% CI <sup>a</sup> | P value   |
| Gender (male vs. female)                          | 1.34       | 0.85-2.11 | 0.202     | -               | -                   | -         |
| Age ( $\geq 60$ y vs. $< 60$ y)                   | 1.26       | 0.88-1.79 | 0.208     | -               | -                   | -         |
| Smoking (ever vs. never)                          | 1.20       | 0.83-1.75 | 0.335     | -               | -                   | -         |
| Drinking (ever vs. never)                         | 1.20       | 0.84-1.71 | 0.318     | -               | -                   | -         |
| Family history (yes vs. no)                       | 1.00       | 0.67-1.50 | 0.983     | -               | -                   | -         |
| Tumor stage (III/IV vs. I/II)                     | 2.50       | 1.72-3.62 | $< 0.001$ | -               | -                   | -         |
| Differentiation (moderate/poor vs. well)          | 1.16       | 0.72-1.88 | 0.535     | -               | -                   | -         |
| Treatment (surg+chemo/radiotherapy vs. surg only) | 0.86       | 0.38-1.96 | 0.719     | -               | -                   | -         |
| NSUN2 RNA level (high vs. low)                    | 2.17       | 1.50-3.13 | $< 0.001$ | 1.94            | 1.32-2.85           | $< 0.001$ |
| GRB2 RNA level (high vs. low)                     | 1.86       | 1.29-2.68 | $< 0.001$ | 1.78            | 1.22-2.61           | 0.003     |
| GRB2 RNA m <sup>5</sup> C level (high vs. low)    | 2.00       | 1.39-2.90 | $< 0.001$ | 1.70            | 1.16-2.49           | 0.007     |

<sup>a</sup>The HR and 95% CI of NSUN2 RNA, GRB2 RNA and GRB2 m<sup>5</sup>C were calculated with adjustments for gender, age, smoking status, drinking status, family history, tumor stage, tumor differentiation and treatment as covariates. HR, hazard ratio; CI, confidence interval.

**Supplementary Table 4.** Baseline demographic and clinical characteristics of individuals with ESCC used for IHC in this study.

| Variable                                | All cases<br>(N = 59) | Alive<br>(N = 24) | Deceased<br>(N = 35) | P value <sup>d</sup> |
|-----------------------------------------|-----------------------|-------------------|----------------------|----------------------|
| Age(years), mean (S.E.M. <sup>a</sup> ) | 62.27 (1.12)          | 62.17 (1.44)      | 62.34 (1.63)         | 0.939                |
| Sex, N (%)                              |                       |                   |                      |                      |
| Male                                    | 47 (79.7)             | 17 (70.8)         | 30 (85.7)            | 0.287                |
| Female                                  | 12 (20.3)             | 7 (29.2)          | 5 (14.3)             |                      |
| Family history, N (%)                   |                       |                   |                      |                      |
| Yes                                     | 13 (22.0)             | 5 (20.8)          | 8 (22.9)             | 0.854                |
| No                                      | 46 (78.0)             | 19 (79.2)         | 27 (77.1)            |                      |
| Smoking status <sup>b</sup> , N (%)     |                       |                   |                      | 0.297                |
| Ever                                    | 39 (66.1)             | 14 (58.3)         | 25 (71.4)            |                      |
| Never                                   | 20 (33.9)             | 10 (41.7)         | 10 (28.6)            |                      |
| Drinking status <sup>b</sup> , N (%)    |                       |                   |                      | 0.821                |
| Ever                                    | 26 (44.1)             | 11 (45.8)         | 15 (42.9)            |                      |
| Never                                   | 33 (55.9)             | 13 (54.2)         | 20 (57.1)            |                      |
| Differentiation, N (%)                  |                       |                   |                      | 0.951                |
| Well                                    | 14 (23.7)             | 6 (25.0)          | 8 (22.9)             |                      |
| Moderate                                | 29 (49.2)             | 12 (50.0)         | 17 (48.5)            |                      |
| Poor                                    | 16 (27.1)             | 6 (25.0)          | 10 (28.6)            |                      |
| Tumor stage <sup>c</sup> , N (%)        |                       |                   |                      | 0.122                |
| I                                       | 3 (5.1)               | 2 (8.3)           | 1 (2.9)              |                      |
| II                                      | 22 (37.3)             | 12 (50.0)         | 10 (28.6)            |                      |
| III                                     | 32 (54.2)             | 9 (37.5)          | 23 (65.6)            |                      |
| IV                                      | 2 (3.4)               | 1 (4.2)           | 1 (2.9)              |                      |

<sup>a</sup>S.E.M., standard error of mean.

<sup>b</sup>Individuals who smoked an average of <1 cigarette/day and for <1 year in their lifetime were defined as nonsmokers; otherwise, they were defined as smokers. Individuals were classified as drinkers if they drank at least twice a week and continuously for at least 1 year during their lifetime; otherwise, they were defined as nondrinkers.

<sup>c</sup>Tumor staging were reviewed by at least 3 pathologists and defined according to the American Joint Committee on Cancer (AJCC) 7th edition.

<sup>d</sup>P value was calculated by two-sided Chi-square test.



**Supplementary Table 5.** Associations between *NSUN2*, *GRB2* protein level and clinical characteristics of individuals with ESCC used for IHC in this study.

| Variable                                | All cases<br>(N = 59) | Low NSUN2 <sup>d</sup><br>(N = 27) | High NSUN2 <sup>d</sup><br>(N = 32) | P value <sup>e</sup> | Low GRB2 <sup>d</sup><br>(N = 33) | High GRB2 <sup>d</sup><br>(N = 26) | P value <sup>e</sup> |
|-----------------------------------------|-----------------------|------------------------------------|-------------------------------------|----------------------|-----------------------------------|------------------------------------|----------------------|
| Age(years), mean (S.E.M. <sup>a</sup> ) | 62.27 (1.12)          | 62.44 (1.62)                       | 62.13 (1.58)                        | 0.889                | 62.30 (1.29)                      | 62.23 (1.98)                       | 0.975                |
| Sex, N (%)                              |                       |                                    |                                     | 0.741                |                                   |                                    | 0.851                |
| Male                                    | 47 (79.7)             | 21 (77.8)                          | 26 (81.2)                           |                      | 26 (78.8)                         | 21 (80.8)                          |                      |
| Female                                  | 12 (20.3)             | 6 (22.2)                           | 6 (18.8)                            |                      | 7 (21.2)                          | 5 (19.2)                           |                      |
| Family history, N (%)                   |                       |                                    |                                     | 0.550                |                                   |                                    | 0.645                |
| Yes                                     | 13 (22.0)             | 5 (18.5)                           | 8 (25.0)                            |                      | 8 (24.2)                          | 5 (19.2)                           |                      |
| No                                      | 46 (78.0)             | 22 (81.5)                          | 24 (75.0)                           |                      | 25 (75.8)                         | 21 (80.8)                          |                      |
| Smoking status <sup>b</sup> , N (%)     |                       |                                    |                                     | 0.933                |                                   |                                    | 0.511                |
| Ever                                    | 39 (66.1)             | 18 (66.7)                          | 21 (65.6)                           |                      | 23 (69.7)                         | 16 (61.5)                          |                      |
| Never                                   | 20 (33.9)             | 9 (33.3)                           | 11 (34.4)                           |                      | 10 (30.3)                         | 10 (38.5)                          |                      |
| Drinking status <sup>b</sup> , N (%)    |                       |                                    |                                     | 0.562                |                                   |                                    | 0.809                |
| Ever                                    | 26 (44.1)             | 13 (48.1)                          | 13 (40.6)                           |                      | 15 (45.5)                         | 11 (42.3)                          |                      |
| Never                                   | 33 (55.9)             | 14 (51.9)                          | 19 (59.4)                           |                      | 18 (54.5)                         | 15 (57.7)                          |                      |
| Differentiation, N (%)                  |                       |                                    |                                     | 0.087                |                                   |                                    | 0.505                |
| Well                                    | 14 (23.7)             | 10 (37.1)                          | 4 (12.5)                            |                      | 9 (27.3)                          | 5 (19.2)                           |                      |
| Moderate                                | 29 (49.2)             | 11 (40.7)                          | 18 (56.3)                           |                      | 14 (42.4)                         | 15 (57.7)                          |                      |
| Poor                                    | 16 (27.1)             | 6 (22.2)                           | 10 (31.2)                           |                      | 10 (30.3)                         | 6 (23.1)                           |                      |
| Tumor stage <sup>c</sup> , N (%)        |                       |                                    |                                     | 0.002                |                                   |                                    | 0.003                |
| I                                       | 3 (5.1)               | 2 (7.4)                            | 1 (3.1)                             |                      | 2 (6.1)                           | 1 (3.8)                            |                      |
| II                                      | 22 (37.3)             | 16 (59.3)                          | 6 (18.8)                            |                      | 18 (54.5)                         | 4 (15.4)                           |                      |
| III                                     | 32 (54.2)             | 9 (33.3)                           | 23 (71.9)                           |                      | 13 (39.4)                         | 19 (73.1)                          |                      |
| IV                                      | 2 (3.4)               | 0 (0.0)                            | 2 (6.2)                             |                      | 0 (0.0)                           | 2 (7.7)                            |                      |

<sup>a</sup>S.E.M., standard error of mean.

<sup>b</sup>Individuals who smoked an average of <1 cigarette/day and for <1 year in their lifetime were defined as nonsmokers; otherwise, they were defined as smokers. Individuals were classified as drinkers if they drank at least twice a week and continuously for at least 1 year during their lifetime; otherwise, they were defined as nondrinkers.

<sup>c</sup>Tumor staging were reviewed by at least 3 pathologists and defined according to the American Joint Committee on Cancer (AJCC) 7th edition.

<sup>d</sup>High is defined as IHC Score > 6 and low is defined as IHC Score ≤ 6.

<sup>e</sup>*P* value was calculated by two-sided Chi-square test.

**Supplementary Table 6.** Univariate and multivariate Cox regression analysis for overall survival in ESCC patients.

| Variable                                 | Univariate |           |                | Multivariate    |                     |                |
|------------------------------------------|------------|-----------|----------------|-----------------|---------------------|----------------|
|                                          | HR         | 95% CI    | <i>P</i> value | HR <sup>a</sup> | 95% CI <sup>a</sup> | <i>P</i> value |
| Gender (male vs. female)                 | 2.04       | 0.79-5.26 | 0.134          | -               | -                   | -              |
| Age (≥62 y vs. < 62 y)                   | 1.71       | 0.87-3.37 | 0.116          | -               | -                   | -              |
| Smoking (ever vs. never)                 | 1.62       | 0.78-3.39 | 0.194          | -               | -                   | -              |
| Drinking (ever vs. never)                | 1.00       | 0.51-1.96 | 0.995          | -               | -                   | -              |
| Family history (yes vs. no)              | 0.94       | 0.43-2.07 | 0.874          | -               | -                   | -              |
| Tumor stage (III/IV vs. I/II)            | 2.40       | 1.17-4.94 | 0.014          | -               | -                   | -              |
| Differentiation (moderate/poor vs. well) | 1.08       | 0.49-2.38 | 0.844          | -               | -                   | -              |
| NSUN2 protein level (high vs. low)       | 3.52       | 1.67-7.41 | < 0.001        | 3.52            | 1.46-8.49           | 0.005          |
| GRB2 protein level (high vs. low)        | 3.31       | 1.66-6.60 | < 0.001        | 3.64            | 1.57-8.41           | 0.003          |

<sup>a</sup>The HR and 95% CI of NSUN2 protein and GRB2 protein were calculated with adjustments for gender, age, smoking status, drinking status, family history, tumor stage and tumor differentiation as covariates. HR, hazard ratio; CI, confidence interval.

**Supplementary Table 7.** Characteristics of ESCC individuals for RNA-BisSeq and RNA-Seq in this study.

| Sample ID | Sex    | Age, year | Smoking status <sup>a</sup> | Drinking status <sup>a</sup> | Family history | Tumor stage <sup>b</sup> | Differentiation | Treatment    |
|-----------|--------|-----------|-----------------------------|------------------------------|----------------|--------------------------|-----------------|--------------|
| 1         | Male   | 68        | Smoker                      | Drinker                      | No             | III                      | Moderate        | Surgery Only |
| 2         | Female | 63        | Smoker                      | Nondrinker                   | No             | II                       | Moderate        | Surgery Only |
| 3         | Female | 66        | Nonsmoker                   | Nondrinker                   | No             | II                       | Well            | Surgery Only |
| 4         | Male   | 51        | Smoker                      | Drinker                      | No             | IV                       | Moderate        | Surgery Only |
| 5         | Male   | 69        | Smoker                      | Drinker                      | No             | III                      | Moderate        | Surgery Only |
| 6         | Male   | 56        | Nonsmoker                   | Nondrinker                   | No             | III                      | Moderate        | Surgery Only |
| 7         | Male   | 51        | Smoker                      | Drinker                      | No             | III                      | Moderate        | Surgery Only |

<sup>a</sup>Individuals who smoked an average of <1 cigarette/day and for <1 year in their lifetime were defined as nonsmokers; otherwise, they were defined as smokers. Individuals were classified as drinkers if they drank at least twice a week and continuously for at least 1 year during their lifetime; otherwise, they were defined as nondrinkers.

<sup>b</sup>Tumor staging were reviewed by at least 3 pathologists and defined according to the American Joint Committee on Cancer (AJCC) 7th edition.

**Supplementary Table 8.** Primers used in this study.

| <b>For qRT-PCR</b>                                   | <b>Primer sequence (5' → 3')</b> |
|------------------------------------------------------|----------------------------------|
| <i>NSUN2</i> -Forward                                | GAAC TTGCCTGGCACACAAAT           |
| <i>NSUN2</i> -Reverse                                | TGCTAACAGCTTCTTGACGACTA          |
| <i>NSUN6</i> -Forward                                | CAGAATGCCTTATTGTTAGGGCT          |
| <i>NSUN6</i> -Reverse                                | ACCATATCAAGTTTAACCGCCTT          |
| <i>E2F1</i> -Forward                                 | ACGTGACGTGTCAGGACCT              |
| <i>E2F1</i> -Reverse                                 | GATCGGGCCTTGTTTGCTCTT            |
| <i>TFAP2C</i> -Forward                               | CTGTTGCTGCACGATCAGACA            |
| <i>TFAP2C</i> -Reverse                               | CTCAGTGGGGTTCATTACGGC            |
| <i>SP1</i> -Forward                                  | TGGCAGCAGTACCAATGGC              |
| <i>SP1</i> -Reverse                                  | CCAGGTAGTCCTGTCAGAACTT           |
| <i>NRF1</i> -Forward                                 | AGGAACACGGAGTGACCCAA             |
| <i>NRF1</i> -Reverse                                 | TATGCTCGGTGTAAGTAGCCA            |
| <i>GRB2</i> -Forward                                 | ATTCCTGCGGGACATAGAACA            |
| <i>GRB2</i> -Reverse                                 | GGTGACATAATTGCGGGGAAAC           |
| <i>LIN28B</i> -Forward                               | CATCTCCATGATAAACCGAGAGG          |
| <i>LIN28B</i> -Reverse                               | GTTACCCGTATTGACTCAAGGC           |
| <i>YBX1</i> -Forward                                 | AAGGAGAAAAGGGTGCGGAG             |
| <i>YBX1</i> -Reverse                                 | CCTACGACGTGGATAGCGTC             |
| <i>Rluc</i> -Forward                                 | ATATTGAGCCAGTAGCGCGG             |
| <i>Rluc</i> -Reverse                                 | GCCAAACAAGCACCCCAATC             |
| <i>Fluc</i> -Forward                                 | GTGTCCGATTCAATCATGCC             |
| <i>Fluc</i> -Reverse                                 | CCAGCAGGGCAGATTGAATC             |
| $\beta$ -Actin-Forward                               | ACAGAGCCTCGCCTTTGCCGAT           |
| $\beta$ -Actin-Reverse                               | CTTGACATGCCGGAGCCGTT             |
| <b>For <i>Nsun2</i> knockout mice identification</b> | <b>Primer sequence (5' → 3')</b> |
| <i>Nsun2</i> -Forward                                | ACTGCCTACTACTCATGCCTTA           |
| <i>Nsun2</i> -Reverse                                | GACAGCCTGGTCCTACACTC             |
| <b>For m<sup>5</sup>C-RIP-qPCR</b>                   | <b>Primer sequence (5' → 3')</b> |
| <i>GRB2</i> -Forward                                 | CACATCCCCTGGATCTGGC              |
| <i>GRB2</i> -Reverse                                 | ATGACTTCCTCCTCCGCTCT             |
| <i>HRAS</i> -Forward                                 | CGCCCGCAACCCGAG                  |
| <i>HRAS</i> -Reverse                                 | ACCGTTCACAGGCGCGA                |
| <i>PIK3R3</i> -Forward                               | CCAGTTGCCACATGACTTGC             |
| <i>PIK3R3</i> -Reverse                               | TCTCCCCCTCTACACACCAG             |
| <i>FGFR4</i> -Forward                                | CTGACACAGTGCTCGACCTT             |
| <i>FGFR4</i> -Reverse                                | AACCCTGACATTTGGGCCAT             |
| <i>CREB1</i> -Forward                                | ATTTCTCATTGGAGCCG                |
| <i>CREB1</i> -Reverse                                | TGAACTCTTGACCACAGG               |
| <i>RASD2</i> -Forward                                | ACCTGGCTCAGCAGGAG                |
| <i>RASD2</i> -Reverse                                | AGGCGCAAGGGGCAGGT                |
| <i>PLCG1</i> -Forward                                | TGGTGACCTCAGTCCCTTCA             |
| <i>PLCG1</i> -Reverse                                | TAGCGGGATTCAAAGGAGCC             |
| <i>ITGAX</i> -Forward                                | CAGGCTGCAGTATTTGGGC              |

|                            |                                  |
|----------------------------|----------------------------------|
| <i>ITGAX</i> -Reverse      | CAGGTCCACCAGTCCATCCT             |
| <b>For PAR-CLIP-qPCR</b>   | <b>Primer sequence (5' → 3')</b> |
| <i>GRB2</i> -Forward       | CACATCCCACTGGATCTGGC             |
| <i>GRB2</i> -Reverse       | ATGACTTCCTCCTCCGCTCT             |
| <b>For ChIP-qPCR</b>       | <b>Primer sequence (5' → 3')</b> |
| <i>NSUN2</i> -ChIP-Forward | GCCGTACACTGAGTTCGTC              |
| <i>NSUN2</i> -ChIP-Reverse | GGAGGAGCGCCTGCTG                 |

**Supplementary Table 9.** Antibodies utilized in this study.

| Antibody                    | Application | Source                    | Catalog number |
|-----------------------------|-------------|---------------------------|----------------|
| Rabbit anti-NSUN2           | WB/IHC      | Proteintech               | 20854-1-AP     |
| Rabbit anti-GRB2            | WB/IHC      | Abcam                     | ab32037        |
| Mouse anti-E2F1             | WB/ChIP     | Proteintech               | 66515-1-Ig     |
| Rabbit anti-LIN28B          | WB/IP       | Proteintech               | 24017-1-AP     |
| Rabbit anti-HSP90B1         | WB          | Proteintech               | 14700-1-AP     |
| Rabbit anti-PKM             | WB          | Proteintech               | 10078-2-AP     |
| Rabbit anti-CSDE1           | WB          | Proteintech               | 13319-1-AP     |
| Rabbit anti-ENO1            | WB          | Proteintech               | 11204-1-AP     |
| Rabbit anti-CDC5L           | WB          | Proteintech               | 12974-1-AP     |
| Rabbit anti-SPIRE1          | WB          | Signalway Antibody        | 47711          |
| Rabbit anti-AKT1/2/3        | WB          | Abcam                     | ab126811       |
| Rabbit anti-phospho AKT     | WB          | Cell Signaling Technology | 4060S          |
| Rabbit anti-ERK1/2          | WB          | Abcam                     | ab17942        |
| Rabbit anti-phospho ERK1/2  | WB          | Abcam                     | ab76299        |
| Rabbit anti-MEK1/2          | WB          | Abcam                     | ab178876       |
| Rabbit anti-phospho MEK1/2  | WB          | Abcam                     | ab194754       |
| Mouse anti-5-methylcytosine | IP          | Abcam                     | ab10805        |
| Mouse anti-FLAG             | WB          | Sigma-Aldrich             | F1804          |
| Mouse anti-ACTIN            | WB          | Proteintech               | 66009-1-Ig     |

**Supplementary Table 10.** Targeted sequences of shRNAs or siRNAs and probe sequences of *GRB2* used in this study.

| <b>Targeted sequences of shRNA or siRNA (5' → 3')</b>       |                                                                           |
|-------------------------------------------------------------|---------------------------------------------------------------------------|
| shNSUN2-#1                                                  | CACGTGTTCACTAAACCCTAT                                                     |
| shNSUN2-#2                                                  | GCTTGCTGATGTGTCTAAT                                                       |
| shGRB2-#1                                                   | CCCAAGAACTACATAGAAA                                                       |
| shGRB2-#2                                                   | CCAGAAACCAGCAGATATT                                                       |
| shLIN28B-#1                                                 | GGATATTCCAGTCGATGTATT                                                     |
| shLIN28B-#2                                                 | GCCATTA CTGT CAGAGCATCA                                                   |
| siE2F1-#1                                                   | GCATCCAGCTCATTGCCAA                                                       |
| siE2F1-#2                                                   | CCTCTTCGACTGTGACTTT                                                       |
| siSP1-#1                                                    | GCGTTTCTGCAGCTACCTT                                                       |
| siSP1-#2                                                    | CCATTAACCTCAGTGCATT                                                       |
| siTFAP2C-#1                                                 | GCACGATCAGACAGTCATT                                                       |
| siTFAP2C-#2                                                 | CCAGTGGCAGAATATTTAA                                                       |
| siNRF1-#1                                                   | GCCACAGCCACACATAGTA                                                       |
| siNRF1-#2                                                   | GGAAACTTCGAGCCACGTT                                                       |
| siYBX1-#1                                                   | GGATATGGTTTCATCAACA                                                       |
| siYBX1-#2                                                   | CGTAACCATTATAGACGCT                                                       |
| <b>Probe sequences for RNA pulldown and REMSA (5' → 3')</b> |                                                                           |
| <i>GRB2</i> [C]                                             | GGTCGGAAGCCTGTCCTCACCGTCTCGGGGTTGTGGCCCCGCCCCCTC-biotin                   |
| <i>GRB2</i> [m <sup>5</sup> C]                              | GGTCGGAAGCCTGTCCTCACCGTCT[m <sup>5</sup> C]GGGGGTTGTGGCCCCGCCCCCTC-biotin |
